1 *Brucella* Peptide Cross-Reactive MHC  
2 I Presentation Activates SIINFEKL-  
3 Specific TCR Expressing T Cells

4 Jerome S. Harms<sup>1,3,5</sup>, Mike Khan<sup>1,2,6</sup>, Cherisse Hall<sup>1,7</sup>, Gary A. Splitter<sup>3,8</sup>, E. Jane  
5 Homan<sup>4,9</sup>, Robert D. Bremel<sup>4,10</sup>, and Judith A. Smith<sup>1,2,11</sup>

6

7 **Running Title:** *Brucella* peptides are cross-reactive with SIINFEKL

8

9 **Keywords:** *Brucella melitensis*, Cross-reactivity, Chicken ovalbumin, MHC class I, T  
10 cell receptor

11

12 <sup>1</sup>Department of Pediatrics, <sup>2</sup>Cellular and Molecular Pathology Training Program, School  
13 of Medicine and Public Health; <sup>3</sup>Department of Pathobiological Sciences, School of  
14 Veterinary Medicine, University of Wisconsin-Madison and <sup>4</sup>ioGenetics LLC, Madison,  
15 Wisconsin, USA

16

17 <sup>5</sup>[jsharms@wisc.edu](mailto:jsharms@wisc.edu), <sup>6</sup>[mkhan23@wisc.edu](mailto:mkhan23@wisc.edu), <sup>7</sup>[cljhall@gmail.com](mailto:cljhall@gmail.com),  
18 <sup>8</sup>[gary.splitter@wisc.edu](mailto:gary.splitter@wisc.edu), <sup>9</sup>[jane\\_homan@io genetics.com](mailto:jane_homan@io genetics.com),  
19 <sup>10</sup>[robert\\_bremel@io genetics.com](mailto:robert_bremel@io genetics.com), <sup>11</sup>[jsmith27@wisc.edu](mailto:jsmith27@wisc.edu)

20

21 Corresponding author: Jerome Harms, Dept. of Pediatrics, School of Medicine and  
22 Public Health, University of Wisconsin-Madison, 1550 Linden Drive, Madison, WI  
23 53706, USA; [jsharms@wisc.edu](mailto:jsharms@wisc.edu)

24

## 25 ABSTRACT

26 *Brucella spp* are intracellular pathogenic bacteria remarkable in their ability to escape  
27 immune surveillance and therefore inflict a state of chronic disease within the host. To  
28 enable further immune response studies, *Brucella* were engineered to express the well  
29 characterized chicken ovalbumin (OVA). Surprisingly, we found that CD8 T cells bearing  
30 T cell receptors (TCR) nominally specific for the OVA peptide SIINFEKL (OT-1) reacted  
31 to parental *Brucella*-infected targets as well as OVA-expressing *Brucella* variants in  
32 cytotoxicity assays. Furthermore, splenocytes from *Brucella* immunized mice produced  
33 IFN- $\gamma$  and exhibited cytotoxicity in response to SIINFEKL-pulsed target cells. To  
34 determine if the SIINFEKL-reactive OT-1 TCR could be cross-reacting to *Brucella*  
35 peptides, we searched the *Brucella* proteome using an algorithm to generate a list of  
36 near-neighbor nonamer peptides that would bind to H2K<sup>b</sup>. Selecting five *Brucella*  
37 peptide candidates, along with controls, we verified that several of these peptides  
38 mimicked SIINFEKL resulting in T cell activation through the “SIINFEKL-specific” TCR.

39 Activation was dependent on peptide concentration as well as sequence. Our results  
40 underscore the complexity and ubiquity of cross-reactivity in T cell recognition. This  
41 cross-reactivity may enable microbes such as *Brucella* to escape immune surveillance  
42 by presenting peptides similar to the host, and may also lead to the activation of  
43 autoreactive T cells.

44

45

## 46 INTRODUCTION

47 Brucellosis is a zoonotic disease caused by the gram-negative, facultative coccobacilli  
48 bacteria of the genus, *Brucella*. *Brucella* spp reside intracellularly within the host  
49 organism, preferring macrophages and macrophage-related cells. However, they also  
50 can persist extracellularly or outside the host. Symptoms of the disease are variable,  
51 including undulant fever, osteoarticular, genitourinary, and neurological complications.  
52 Within the host, *Brucella* have demonstrated the ability either to hide from or misdirect  
53 the immune response leading to chronic disease and complicating vaccine development  
54 (1). Although cytotoxic T lymphocytes (CTL) are a potentially major contributor to the  
55 control of brucellosis (2-4), the actual role of MHC class I-restricted CTL is unclear. One  
56 study demonstrated that the absence of perforin did not affect the level of infection (5,  
57 6). On the other hand, in the study by Oliveira et al.  $\beta 2m^{-/-}$  mice were impaired in  
58 containment of *Brucella* infection(7), and Murphy et al. showed that CD8 T cell depletion  
59 exacerbated disease (8). *Brucella* have the ability to sabotage adaptive immune  
60 response, through undefined suppressive or regulatory means leading to the

61 appearance of apparently exhausted CD8 T cells (3). The events producing exhaustion,  
62 as well as the nature of this state during chronic *Brucella* infection await better definition  
63 but nevertheless suggest that CTL could be key in limiting infection if not suppressed. In  
64 other model systems of CD8 exhaustion, notably lymphocytic choriomeningitis virus  
65 (LCMV), the study of T cell responses has benefited tremendously from the availability  
66 of specific research tools such as T cell receptor (TCR) transgenics. In comparison,  
67 *Brucella* research has been relatively hindered by the inability to identify antigen specific  
68 T cells. Although peptide epitopes have been published, there are no functional  
69 tetramers. To address this deficit, we sought to engineer *Brucella* to express a defined  
70 antigen that the infected antigen presenting cell (APC) would present in the context of  
71 MHC class I (MHC I) to more readily characterize the immune response to *Brucella*  
72 infection using a mouse model.

73

74 Due to its long history in immunological research, OVA is one of the best characterized  
75 model antigens, with epitopes that have been mapped for several mouse strains.  
76 Transgenic mice expressing the variable region of the TCR specific to the OVA peptide  
77 SIINFEKL (9) are referred to as OT-1. Every CD8<sup>+</sup> T cell expresses this TCR transgene  
78 (10). The combination of OT-1–TCR-transgenic T cells and OVA-derived peptide  
79 SIINFEKL in the context of H2K<sup>b</sup> is the most widely examined TCR-pMHC (peptide-  
80 MHC) complex (10, 11). Because of these readily available research tools, OVA has  
81 been a reference protein used to study CD8 T cell responses in other intracellular  
82 infections. Previous research has shown that intracellular bacteria such as *Listeria*

83 *monocytogenes* or *Mycobacterium bovis* (BCG) expressing the OVA antigen induce  
84 strong antigen-specific primary and memory CD8 T cell responses (12-15).

85

86 In this study, we engineered and characterized OVA-expressing *Brucella* with the intent  
87 of studying primary and secondary CD8 T cell responses in acute and chronic  
88 brucellosis using the mouse model. Unexpectedly, we found the research tools used to  
89 analyze OVA antigen—specifically the cloned OT-1 TCR that recognizes SIINFEKL  
90 peptide presented by H2K<sup>b</sup>—reacted to native *Brucella* infection as well. We therefore  
91 hypothesized that the *Brucella* proteome contains sequences similar to, or mimicking,  
92 the OVA SIINFEKL peptide. These results suggest the OT-1 TCR transgenic mice may  
93 be used to study native *Brucella* infections and further raises questions about the nature  
94 of cross presentation and molecular mimicry.

95

## 96 MATERIALS AND METHODS

97 **Mice.** C57BL/6 (Harlan) and C57BL/6-Tg(TcraTcrb)100Mjb/J (Jackson) were housed  
98 and cared for in AAALAC certified facilities of the University of Wisconsin School of  
99 Veterinary Medicine. Care, handling and experimental procedures were approved by  
100 the Institutional Animal Care and Use Committee (IACUC) with strict adherence.

101

102 **Cells and Cell culture.** *Brucella melitensis* 16M strains and all *Escherichia coli* strains  
103 used in this project were cultured in Brain Heart Infusion (BHI) broth or agar at 37°C.

104 Mouse dendritic cell line DC 2.4 (H2K<sup>b</sup>), and mouse monocyte cell line LADMAC were  
105 cultured in RPMI supplemented with 10% FCS, and 1mM sodium pyruvate (R10) in a  
106 humidified 37°C incubator with 5% CO<sub>2</sub>. The B3Z CD8<sup>+</sup> T cell hybridoma cell line,  
107 specific for the SIINFEKL (OVA<sub>257-264</sub>/K<sup>b</sup>) peptide of OVA, was a kind gift from Dr. J.D.  
108 Sauer (University of Wisconsin-Madison). B3Z cells were cultured in R10 + 500 µg/ml  
109 G418 (Geneticin). Bone marrow derived macrophages (BMDM) were prepared by the  
110 culturing of bone marrow cells from the tibia/fibula of mice in R10 conditioned with 20%  
111 LADMAC supernatant.

112

113 **Plasmid and transposon engineering.** We used the EZ-Tn5<sup>™</sup> (Lucigen) transposon  
114 mutagenesis system for random insertion into the *Brucella* genome following the  
115 manufacturer's recommended protocol. The insert was cloned into the transposon  
116 construction vector pMOD<sup>™</sup>-3 <R6K<sub>γori</sub>/MCS> so that rescue cloning could be  
117 performed to determine the insertion site within the transformed *Brucella*. The partial  
118 OVA sequence was amplified from the vector pPL2erm-ActA100-B8R-OVA (kind gift  
119 from Dr. J.D. Sauer). Primers incorporated a *Brucella* ribosome binding site (RBS)  
120 designed using the algorithm, RBS Calculator v2.0, for high translation initiation (16,  
121 17). The primers also contained *Eco*RI and *Bam*HI Restriction sites for subcloning into  
122 pECFP-N1 (Clontech) to produce an OVA-CFP fusion protein. Primers were as follows:

123 N'-

124 TGAAAGCAAAAGCAGAGAATTCTGGAATATTTTAATTCAGTATCAAAGAGAGGTAAA  
125 CATGCAAGCCAGAGAGCTCATCA; C'-

126 TTGAGGATCCTTCAGGCTCTCTGCTGAGGAGATGCCAGACAGA. PCR was

127 performed using GoTaq® Flexi DNA Polymerase system (Promega) with 6 mM MgCl<sub>2</sub>,  
128 and 55°C anneal temperature. The 632 bp product was subcloned into pECFP-N1.  
129 The fusion product was inserted into the *EcoRI/XbaI* site of pMOD-3. Finally, the  
130 Kanamycin resistance sequence was added to the *SaI* site from pUC4k (Amersham)  
131 that we had modified to be flanked by loxP sites. The final product was named pMOD3-  
132 OVA-CFP. The map can be seen in **supplemental Figure S1**.

133

134 ***Brucella* transformation and rescue cloning.** Transposons were generated by PCR  
135 following the manufacturer's recommended protocol (Lucigen). Electrocompetent  
136 *Brucella* were prepared by growing *Brucella* to log phase in BHI broth. *Brucella* was  
137 pelleted and washed at least four times with ice cold water. The electrocompetent  
138 *Brucella* (50 µl) was then electroporated with the transposon (2 µl). Then, 950 µl of BHI  
139 was immediately added to the cells followed by overnight shaking in an incubator at  
140 37°C. The next day, 200 µl of cells were plated on BHI agar plates containing 50 mg/L  
141 kanamycin. Plates were cultured for 5-7 days at 37°C. Clones were then selected and  
142 cultured in 96-well plates as a bacterial library and clones from the library were then  
143 propagated for rescue cloning of the transposon insertion site. Rescue cloning was  
144 performed following the manufacturer's (Lucigen) protocol. Briefly, *Brucella*  
145 transformant genomic DNA was extracted using MasterPure DNA purification kit  
146 (Epicentre) and 2 µg of DNA was digested to completion with *NcoI* overnight to  
147 generate a fragment with intact transposon and flanking sequences. Digested DNA was  
148 religated using a FastLink DNA ligation kit (Epicentre). Ligations were column purified

149 and transformed into electrocompetent EC100D*pir+* cells (Epicentre) and plated on BHI  
150 agar containing kanamycin (50 µg/ml). Kanamycin-resistant colonies were selected, the  
151 plasmid was extracted, and the site of insertion was identified by sequencing the  
152 plasmid DNA bidirectionally using outward primers [forward (FSP; 5'-  
153 GCCAACGACTACGCACTAGCCAAC) and reverse (RSP; 5'-  
154 GAGCCAATATGCGAGAACACCCGAGAA)]. Sequencing was performed at the DNA  
155 sequencing core facility of the University of Wisconsin Biotechnology Center.  
156 Sequences were compared to the 16M genome sequence to determine the site of  
157 insertion.

158

159 **Western Blotting.** Protein lysate of both bacteria and mammalian cells extract was  
160 made using B-PER™ Bacterial protein extraction reagent (ThermoFisher). Proteins  
161 were prepared for SDS-PAGE by heat denaturation in Laemmli sample buffer (BIO-  
162 RAD). Equal amounts of protein were added to wells of a 4-20% Tris-HCl gradient gel  
163 (BIO-RAD) along with SuperSignal® molecular weight protein ladder. Separated  
164 proteins were transferred to nitrocellulose (BIO-RAD). Western blotting was performed  
165 utilizing a Pierce® Fast Western blot kit following the manufacturer's instructions.  
166 Antibodies included mouse monoclonal anti-OVA (3G2E1D9; GenTex), and mouse  
167 monoclonal anti-GFP (B-2; SCBT) used at recommended dilutions. Chemiluminescent  
168 blots were visualized on X-ray film.

169



170 **Fluorescence Microscopy.** BMDM were prepared from C57BL/6 mice and plated on  
171 chambered coverslips (IBIDI). Some samples were then infected (1000 MOI) with  
172 *Brucella* expressing tdTomato fluorescent protein (CLONTECH) for 24 h. The high MOI  
173 was chosen to increase sensitivity consistent with our previous studies (18). Other  
174 samples were pulsed with SIINFEKL peptide (50  $\mu$ M) Cell samples were fixed in 4%  
175 paraformaldehyde and processed for fluorescence confocal microscopy. Cells were  
176 stained with monoclonal antibody to OVA 257-264 (SIINFEKL) peptide bound to H2K<sup>b</sup>  
177 (eBioscience) and then with goat anti-mouse IgG (H+L) Alexa Fluor 488 (Dylight;  
178 ThermoFisher). Imaging was performed at the University of Wisconsin Optical Imaging  
179 Core using either a Nikon A1RS confocal microscope or a Leica SP8 3X STED Super-  
180 resolution microscope.

181

182 **Cytotoxic T Lymphocyte (CTL) Assay.** For the CTL assays, assessment consisted of  
183 measuring extracellular activity of dead-cell protease by luminescence using the  
184 CytoTox-Glo™ Cytotoxicity Assay (Promega). Effector and targets for the assay varied  
185 as described below. Immune effectors were prepared as follows: Mice (C57BL/6,  
186 female, 4wks old) were injected intraperitoneally with PBS (diluent control) or  $2 \times 10^6$   
187 *Brucella* in 200  $\mu$ l PBS (*B. melitensis*, *B. melitensis* ova-cfp #3, *B. melitensis* ova-cfp  
188 #4). Each group consisted of 4 mice. After three weeks, mice were euthanized and  
189 splenocytes were harvested. CD8+ T cell effectors were isolated from splenocytes  
190 using a MACS CD8a+ T cell isolation kit (Miltenyi). Targets consisted of splenocytes  
191 from age-controlled mice that were pulsed with OVA<sub>257-264</sub> peptide (SIINFEKL) or not  
192 peptide-pulsed. Briefly, mononuclear splenocytes were suspended in complete growth

193 media (R10) at  $5 \times 10^6$ /ml. OVA peptide (SIINFEKL; GenScript) was added at 1  $\mu$ l/ml  
194 from a 200  $\mu$ M stock and cells were incubated at 37°C for 1h. To control for non-  
195 specific cytotoxicity, unpulsed target controls were also included in the assay and this  
196 background level was subtracted from the experimental levels. Targets, effectors, and  
197 controls were plated in triplicate in 96-well round bottom plates. Cells were incubated  
198 for 5 h then assayed by luminometry. Specific cytotoxicity represents SIINFEKL pulsed  
199 target cell death minus background non-pulsed target cell death. The OT-1 effector  
200 cytotoxicity assay was prepared as follows: Splenocytes from OT-1 mice (C57BL/6-  
201 Tg(TcraTcrb)1100Mjb/J) were processed and CD8+ T cell effectors (OT-1 cells) were  
202 isolated using a MACS CD8a+ T cell isolation kit (Miltenyi). Targets consisted of DC2.4  
203 mouse (H2K<sup>b</sup>) dendritic cell line that were either non-infected (control), or infected (MOI  
204 100) overnight with *Brucella* (*B. melitensis*, *B. melitensis* ova-cfp #3, *B. melitensis* ova-  
205 cfp #4). Positive control were cells pulsed with OVA peptide (SIINFEKL) as described  
206 above. Targets, effectors, and controls were plated, incubated, and assayed as  
207 described for immune effectors CTL assay above following the manufacturer's  
208 (Promega) recommended protocol and calculations for percent specific cytotoxicity.

209

210 **IFN- $\gamma$  Enzyme Linked Immunosorbent Assay (ELISA).** Effector cells were prepared  
211 by immunizing mice (C57/BL6) as described for the CTL experimental group above  
212 except that an additional group was immunized with OVA peptide (SIINFEKL) at 50  $\mu$ g  
213 in 0.2 ml Sigma Adjuvant System® (Sigma) i.p. following the manufacturer's protocol.  
214 Peptide immunizations were boosted after 2 weeks and one week later, splenocytes  
215 were harvested. Splenocytes from each animal were then stimulated in culture with 1

216  $\mu\text{g/ml}$  of SIINFEKL peptide and incubated for 48 h at 37 °C. Cultured supernatants were  
217 harvested, and IFN- $\gamma$  amounts were determined using the ELISA Ready-Set-Go!  
218 System (Affymatrix; eBioscience) following the manufacturer's protocol.

219

220  **$\beta$ -Galactosidase X-Gal and ONPG Assays.** Cultures containing a mix of B3Z T cell  
221 hybrids and DC2.4 APCs ( $2 \times 10^5$  cells/ml each) were plated in 6-well tissue culture  
222 plates (X-Gal assays) or 96-well flat bottom tissue culture plates (ONPG assays) and  
223 peptide or bacteria added. Peptides (listed in **Table 2**) were synthesized and  
224 purchased from GenScript and resuspended in DMSO at a stock concentration of 20  
225 mg/ml. *B. melitensis* and variants were used at 100 MOI. For some assays, APCs  
226 were treated with Tauroursodeoxycholic acid (TUDCA; Sigma) at 100  $\mu\text{g/ml}$ , or  
227 Tunicamycin (Sigma) at 10 $\mu\text{g/ml}$ , or mouse IFN- $\gamma$  (PromoKine) at 1  $\mu\text{g/ml}$ . After  
228 overnight incubation, cells were washed in PBS and fixed (X-Gal assay) or lysed  
229 (ONPG assay). For X-Gal staining, cells were fixed with 4% PFA for 10 min, then  
230 washed 3X in PBS, and overlaid with a solution of 1 mg X-Gal/ml, 5 mM potassium  
231 ferrocyanide, 5 mM potassium ferricyanide, and 2 mM  $\text{MgCl}_2$ . After an overnight  
232 incubation at 37°C, plates were examined microscopically for the presence of blue (lacZ  
233 expressing) cells. For ONPG staining, we used a Sensolyte® ONPG  $\beta$ -Galactosidase  
234 Assay kit (AnaSpec, Inc) following the manufacturer's recommended protocol except  
235 that the incubation at 37°C was overnight. Absorbance reading was at 405 nm.

236

237 **Prediction of near neighbors**

238 Structural diagrams of binding of SIINFEKL in the H2K<sup>b</sup> murine MHC I molecule (3P9L)  
239 (19) illustrate that this octomer is bound with its C terminal leucine located in the P9  
240 pocket position and the N terminal serine in the P2 pocket position. This results in a  
241 pentamer peptide exposed to the T cell receptors (T cell exposed motif or TCEM) (20).  
242 Amino acids N, E and K protrude particularly prominently from the MHC groove in  
243 positions P5, P7, and P8. By replacing amino acids with those of similar  
244 physicochemical characteristics in T cell exposed positions P4-P8, 31 peptides were  
245 identified which a T cell receptor would likely tolerate and bind as an alternate “near  
246 neighbor” of SIINFEKL. The amino acid substitutions in the exposed positions included  
247 P4: I>L, P5: N>Q, P6: F>I, A, L or Y, P7: E>D, P8: K>R. The *B. melitensis* proteome  
248 and the proteomes of an array of other pathogenic and microbiome bacteria were then  
249 searched to determine the occurrence of each of the alternate TCEM pentamer motifs  
250 P4-P8. Where a near neighbor was identified in *B. melitensis*, the flanking amino acids  
251 were noted, and the predicted binding to murine MHC I alleles was determined in the  
252 context of the native *Brucella* protein using previously described methods (21), and the  
253 probability of cathepsin cleavage at the C terminus of that peptide determined (22, 23).

254

## 255 **Statistical Analyses**

256 Analysis of variance (ANOVA) was used to analyze the differences among group  
257 means. Tukey’s HSD (honest significant difference) test was used as the post hoc  
258 follow-up test comparing every group mean with every other group mean to determine  
259 significant differences among groups.

260

## 261 RESULTS

262 **Engineering and characterization of OVA antigen expressing *Brucella*.** Our long-  
263 term objective being acute and chronic brucellosis immunological studies, we  
264 engineered *Brucella* to express well-characterized antigens with readily available  
265 antigen-specific research tools. *Brucella melitensis* 16M was transformed to express a  
266 fusion protein consisting of a fragment of chicken ovalbumin (OVA) and Cyan  
267 Fluorescent Protein (CFP). This fusion protein sequence was determined to have a  
268 predicted probability of antigenicity of 0.9 as measured by ANTIGENpro software using  
269 the SCRATCH protein predictor (<http://www.ics.uci.edu/~baldig/scratch/index.html>).  
270 The nucleic acid sequence contains a Ribosome Binding Sequence (RBS) optimized for  
271 *Brucella* and the promoter would be provided by the insertion gene (**Figure 1**). The  
272 OVA sequence selected contained OVA<sub>257-264</sub> (SIINFEKL); the well-characterized H2K<sup>b</sup>  
273 restricted peptide epitope (24) and the CFP portion contained the H2K<sup>d</sup> restricted  
274 epitope HYLSTQSAL (25). A library of *Brucella* transposon transformants was made  
275 and rescue cloning performed to determine the transposon insertion site (**Table 1**).  
276 Western blotting of chosen clones using anti-OVA or anti-GFP specific antibodies  
277 determined protein expression (**Figure 2**). Viability of transformed clones were  
278 compared to parental *Brucella* by growth in broth as well as intracellular growth *in vitro*  
279 and *in vivo* measuring CFU from infected BMDM in culture or CFU from splenocytes of  
280 infected mice (**Figure 3**). Clones with comparable growth to wild type (clones #3 and

281 #4) with insertion in *BMEI 1025* and *BMEII 0058* respectively (Table 1), were chosen for  
282 further evaluation.

283

284 **OVA<sub>257-264</sub> (SIINFEKL) is presented by H2K<sup>b</sup> in OVA-expressing *Brucella* infected**  
285 **mouse BMDM.** The next objective was to determine whether the OVA-GFP fusion  
286 protein expressed by the *Brucella* transformants could be processed and presented by  
287 host cell MHC I. More specifically, to determine if the OVA SIINFEKL peptide would be  
288 processed and presented on cell surface MHC class I, we employed an antibody  
289 specific for H2K<sup>b</sup> bound to SIINFEKL peptide. BMDM from C57BL/6 mice were infected  
290 with OVA-expressing *Brucella* and analyzed by fluorescence microscopy (**Figure 4**).  
291 Results indicate that SIINFEKL peptide-MHC I complexes could be directly visualized  
292 on the *Brucella*-OVA infected macrophages.

293

294 **Antigen from wild type *Brucella* mediates OT-1 (OVA-specific) T cell activation**  
295 **and generates effectors capable of recognizing SIINFEKL bound MHC I.** As these  
296 results indicated that the OVA-CFP fusion protein was processed in infected cells, and  
297 that SIINFEKL was presented by H2K<sup>b</sup>, we proceeded to T cell immune response  
298 studies. Unexpectedly, CD8<sup>+</sup> effector T cells from mice immunized with parental and  
299 OVA expressing *Brucella* both reacted to SIINFEKL-pulsed targets (**Figure 5A**).  
300 Indeed, effectors from control *B. melitensis* immunized animals lysed OVA peptide  
301 pulsed targets at a level not significantly different than the OVA-expressing *Brucella*.  
302 These data indicate that *B. melitensis* immune cells can recognize OVA peptide-MHC I.

303 Similar results were observed in separate experiments examining IFN- $\gamma$  cytokine  
304 production. *B. melitensis* immunized effectors produced IFN- $\gamma$  in response to SIINFEKL  
305 peptide at levels not significantly different from the *B. melitensis* OVA immunized  
306 effectors (**Figure 6A**). As expected, IFN- $\gamma$  expression from *Brucella* immunized animals  
307 was significantly less than from OVA-peptide immunized animals. To confirm that the  
308 immunized cell response to SIINFEKL was specific, a separate immunization  
309 experiment was performed using SIINFEKL and a scrambled peptide to pulse the cells  
310 (**Figure 6B**). Production of IFN- $\gamma$  by splenocytes from *Brucella*-immunized mice was  
311 also significantly higher in the presence of SIINFEKL peptide as compared to a  
312 scrambled control peptide.

313

314 To affirm these unexpected results, we altered our CTL assay approach by utilizing the  
315 well characterized SIINFEKL-specific T cell receptor expressing OT-1 CD8<sup>+</sup> T cells from  
316 TCR transgenic mice. This time the effectors (OT-1) were OVA-peptide specific and the  
317 targets were *Brucella* infected. Targets pulsed with SIINFEKL served as a positive  
318 control. Again, non-OVA expressing *Brucella* infected targets were lysed by OT-1  
319 effectors at similar levels to OVA expressing *Brucella* (**Figure 5B**). As expected, OVA-  
320 peptide pulsed targets lysed at significantly higher levels.

321

322 One possible explanation of the results presented above could be that *Brucella* infection  
323 non-specifically activates T cells because of its effect on antigen presenting cells, or that  
324 we may be observing cross-reactivity of the OT-1 receptor to mouse peptides. *Brucella*

325 infection induces ER stress and IFN production, either of which could potentially  
326 modulate antigen presentation (1, 18, 26). The SIINFEKL specific responses by  
327 *Brucella*-immune cells were significantly greater than un-pulsed or scrambled controls  
328 (**Figure 6B**), arguing against non-specific host stimulation of T cells as the sole  
329 explanation. However, to address this theory more directly, we treated the antigen  
330 presenting cells with infection-associate factors that could potentially alter MHC I-  
331 peptide presentation. The drugs TUDCA and Tunicamycin inhibit or enhance the  
332 Unfolded Protein Response (UPR) respectively (27). IFN- $\gamma$  is known to enhance MHC I  
333 expression (28). To further isolate effects on antigen presentation and simplify  
334 responder population, we utilized the B3Z CD8+ T cell hybridoma with a TCR specific  
335 for the OVA (SIINFEKL)-H2K<sup>b</sup> complex. The cell line was transfected with a lacZ  
336 reporter gene driven by the NFAT (nuclear factor of activated T cells) element of the  
337 human IL2 enhancer. The H2K<sup>b</sup> presentation of SIINFEKL to B3Z cells activates NFAT  
338 and results in  $\beta$ -galactosidase synthesis, which can be detected as blue staining of cells  
339 visualized by microscopy or quantitated by development of the ONPG chromogenic  
340 substrate. The B3Z reporter system is widely used in T cell activation studies (29).  
341 Results shown in **Figure 7** indicate that ER stress modulation or IFN- $\gamma$  treatment did not  
342 result in further activation of B3Z reporter T cells bearing the OVA-specific TCR, by  
343 SIINFEKL peptide or whole *Brucella* infection.

344

345 **Detection of near neighbor T cell exposed motifs in *Brucella* indicates possible**  
346 **molecular mimicry.** These surprising results led us to theorize that there might be  
347 cross-reactivity of the OVA-reactive T cells to structurally related peptides derived from



348 *Brucella*. We performed a search of the *B. melitensis* proteome for the SIINFEKL  
349 sequence. The proteome of *B. melitensis* does not contain a peptide identical to  
350 SIINFEKL. However, 38 peptides were found that comprise a P4-P8 T cell exposed  
351 motif matching one of the peptides having near neighbor physicochemical  
352 characteristics. **Supplemental Table S1** shows these peptides, the *Brucella* proteins of  
353 origin and the predicted binding affinity to murine MHC I alleles H2K<sup>b</sup> and H2D<sup>b</sup> of the  
354 nonamer peptides that contain these motifs. For those peptides having the highest  
355 predicted binding affinity to H2K<sup>b</sup> or H2D<sup>b</sup>, the probability of C terminal cathepsin  
356 excision was examined. Interestingly, for peptides which were predicted to have a high  
357 probability of C terminal cleavage by either cathepsin S or L to permit MHC I binding,  
358 cleavage probability was highest at the position P10, i.e. yielding a decamer peptide.  
359 This is consistent with prior observations that indicate that a decamer may be more  
360 likely to be initially excised than a nonamer (23). This selection process yielded a  
361 ranking of peptides for further study, where four were selected for testing. In making this  
362 selection we also considered proteins that had clearly detectable expression observed  
363 during our previous proteomics and RNAseq studies of infected cells (18). For controls  
364 we selected a peptide comprising a near neighbor motif that was predicted to have low  
365 affinity for H2K<sup>b</sup> or H2D<sup>b</sup>, and a random nonamer peptide. **Table 2** describes the  
366 peptides used in these studies.

367

368 Examination of the proteomes of 4-5 distinct isolates each of 140 other bacterial  
369 pathogens, from 14 genera, identified that peptides comprising the P4-P8 motifs of near  
370 neighbors of SIINFEKL are not uncommon. The frequency of such near neighbor

371 peptides in other pathogens are shown in **Supplemental Table S2**. Each bacterial  
372 proteome examined contains from 4 to 45 near neighbor motifs of SIINFEKL that may  
373 produce cross reactions similar to those shown here for *B. melitensis*, if the flanking  
374 amino acids in each context are conducive to cathepsin cleavage and to MHC I binding.  
375 A similar incidence of the near neighbor peptides was detected in proteomes of 20  
376 bacteria found in the gastrointestinal microbiome (data not shown).

377

378 **Putative *Brucella* peptides can activate OVA-specific TCR bearing T cells.** To  
379 assay cross-reactivity of the putative *Brucella* peptides, we employed the B3Z cell line  
380 (30) and peptide pulsed DC2.4 mouse dendritic cell line (H2K<sup>b</sup>) as APC. Visual  
381 scanning of the lacZ stained cells revealed that all the peptides tested in **Table 2**,  
382 except the random sequence, had some level of staining above background (no peptide  
383 added). In fact, three of the peptides (KSIINAERL, PQKINIDRT, and KNKINLDKL)  
384 were observed to have staining similar to SIINFEKL (**Figure 8**). We then repeated our  
385 assays using peptide dilutions to assess avidity of the pulsed peptide-MHC I and TCR  
386 interaction. The ONPG assays (**Figure 9**) verified our lacZ results that three of the  
387 experimental peptides (KSIINAERL, PQKINIDRT, and KNKINLDKL) had high levels of  
388 TCR (NFAT) activation. ONPG assays also revealed different avidities for the peptides.  
389 **Figure 9B** shows that whereas SIINFEKL avidity did not change much at all dilutions  
390 tested, the *Brucella* peptide avidity decreased with dilution. Notably, the native *Brucella*  
391 KSIINAERKL peptide did not differ significantly from the SIINFEKL peptide until  
392 0.1 µg/ml.

393

394 To determine if infection with the parental *B. melitensis* 16M generated immune  
395 responses to these OVA-TCR cross reactive peptides in vivo, splenocytes from mice  
396 immunized with either B. mel or B. mel-OVA were assayed for IFN- $\gamma$  production after  
397 stimulation with peptide (**Figure 10**). Immune cells did indeed respond to the panel of  
398 cross-reactive peptides with greater cytokine production than to scrambled peptide,  
399 suggesting these epitopes may be generated *in vivo*.

400

401 Finally, we determined if these native *Brucella* peptides could activate OVA-specific  
402 TCR using the OT-1 mouse system. Splenocytes from these mice were pulsed with the  
403 various peptides and IFN- $\gamma$  expression was measured by ELISA. Results shown in  
404 **Figure 11** confirm our findings using the B3Z  $\beta$ -galactosidase reporter cell line that the  
405 OT-1 TCR is cross reactive to peptides of the *Brucella* proteome. Peptide immunization  
406 of the OT-1 mice was not attempted due to an anticipated hyper-immune response (9,  
407 10). Indeed, when we tried infecting these mice with *Brucella* and the *Brucella*-OVA  
408 mutants, the mice died within six days (data not shown).

409

## 410 DISCUSSION

411 The immune response to *Brucella melitensis* is complex, as evidenced by the fact that  
412 there is currently no known effective brucellosis vaccine available. Our research goal  
413 was to engineer *Brucella* to express immunogenic OVA as a tool to follow antigen-

414 specific effector and memory immune responses to *Brucella* infection *in vivo*, using the  
415 mouse model. Adopting this approach, we could employ SIINFEKL-MHC tetramers and  
416 T cells from TCR transgenic mice. This goal was nominally fulfilled. However, the  
417 surprising result was that native *Brucella* also stimulated “OVA-specific” TCR of OT-1  
418 mice. Employing a panel of near-neighbor *Brucella* peptides, cross-reactivity of the  
419 OVA-TCR was evident, although to a lesser extent than the OVA SIINFEKL that was  
420 originally used in clonal selection of the TCR (10, 11, 31). Despite the lower avidity, as  
421 indicated by the B3Z assays, *Brucella* peptides from infections were sufficiently  
422 immunogenic to trigger both robust cytokine and CTL responses via the OVA TCR.  
423 These results suggest that the OT-1 TCR transgenic T cells may be used to probe  
424 native *Brucella* immune responses as well as responses to the *Brucella*-OVA.

425

426 A search of the *Brucella melitensis* proteome revealed several proteins containing T cell  
427 exposed pentamer motif sequences with physicochemical characteristics similar to  
428 SIINFEKL. Such “near neighbor” pentamers were also identified in many other bacteria.  
429 This included proteomes of *Listeria monocytogenes*, *Salmonella enterica*, and  
430 *Mycobacteria bovis* BCG. *Listeria*, *Salmonella*, and BCG have all been engineered to  
431 express OVA similar to the approach shown here with *Brucella* (13, 32, 33). However,  
432 no cross-reactivity of native bacterial peptides to OVA specific TCR was reported. This  
433 may be because the flanking amino acid context precluded binding and presentation in  
434 these bacteria, or that this phenomenon has been observed with other bacteria but not  
435 reported (34). The occurrence of near neighbor pentamers in the gastrointestinal  
436 microbiome organisms suggests that prior exposure to such peptides is difficult to avoid.

437 Sequence scans of other *Brucella* species including *B. abortus*, *B. suis*, *B. neotomae*,  
438 and *B. ovis* showed these pentamer motif sequences to be conserved. One limitation of  
439 this study is that it would not be feasible to delete all genes coding the SIINFEKL near  
440 neighbors to definitively confirm the connection between production of SIINFEKL cross  
441 reactive peptides and recognition of infected cells by OT-1 T cells. Additionally, the  
442 proteins containing the peptides listed in **Table 2** used in these studies may be essential  
443 for survival. In searching the literature describing *Brucella* mutants, we could not find  
444 engineered mutants of these proteins (35, 36) (37, 38), possibly because they did not  
445 survive the mutation process or were severely attenuated.

446

447 An intriguing alternative to our explanation could be that *Brucella* infection alters  
448 presentation of the host proteome. Indeed, our previous studies have found *Brucella*  
449 induces the host Unfolded Protein Response (39, 40) and this ER stress could  
450 theoretically alter host or self-antigen presentation. Further, immune activation during  
451 *Brucella* infection results in IFN- $\gamma$  production, which is known to up-regulate MHC I  
452 expression and self-antigen presentation. Searching the C57/BL6 mouse proteome  
453 revealed no SIINFEKL peptide sequence. However, applying our near neighbor  
454 algorithm did reveal 22 instances of ~~~INFEK~ sequence that would potentially be  
455 exposed to the T cell. Nevertheless, the predicted binding affinity to H2K<sup>b</sup> or H2D<sup>b</sup> was  
456 low compared to the *Brucella* peptides used in this study (data not shown). Testing this  
457 theory using UPR inducer/inhibitors and a cytokine APC activator did not enhance  
458 stimulation of the OVA-specific TCR expressing B3Z T cells. These results suggest the

459 host (mouse) does not present an OVA-like peptide due to ER stress or APC activation  
460 by IFN- $\gamma$ .

461

462 Activation of the T cell through the T cell receptor by peptide-MHC I had been thought to  
463 be peptide specific; however, our results, along with others (41-45) have shown that T  
464 cells can be triggered by peptides with even minimal obvious homology to the primary  
465 immunogenic peptide, or amino acid substitutions with similar charge and size. The  
466 TCR recognizes an immunogenic complex consisting of peptide bound to MHC I with  
467 peptides of 8-11 amino acids in length (46). Of those amino acids, only five are exposed  
468 to the TCR (20, 47). Given the genetic combinatorial rearrangement possibilities, an  
469 estimated  $10^{15}$  unique TCRs could be generated in the mouse (43). However, studies  
470 have shown there are actually  $<10^8$  distinct TCR clones in the human naïve T cell pool  
471 (48), and likely a similar number in mice. Since  $20^9$  foreign peptide nonamers can  
472 theoretically be generated, it would be mathematically impossible for the T cell pool to  
473 recognize all foreign peptides if the TCRs were monospecific (44). Therefore, the TCR  
474 must be degenerate and cross-reactive to near-neighbor motifs as demonstrated here.  
475 In fact, a TCR is estimated to react productively with  $1 \times 10^6$  different MHC-peptides  
476 epitopes (49). T cell cross-reactivity has also been documented using the OT-1  
477 transgenic mice model we used in this study (10). Nevertheless, the degeneracy of the  
478 TCR correlated with differences in avidity to the peptide-MHC I complexes as others  
479 have reported (50). Our studies confirmed that higher concentrations of a degenerate  
480 peptide were needed to activate the “SIINFEKL-specific” TCR to the same level  
481 activation as SIINFEKL itself. Noteworthy is our observation that antibody to H2K<sup>b</sup>

482 bound SIINFEKL is apparently not degenerate but SIINFEKL-specific and could only be  
483 visualized on *Brucella*-OVA infected cells but not *Brucella* infected cells (**Figure 4**).  
484 Whether this is truly due to antibody specificity or perhaps assay sensitivity would need  
485 further investigation.

486

487 Our results underscore the complexity and ubiquity of molecular mimicry in T cell  
488 recognition. The potential for extensive sharing of nonamers between pathogens,  
489 gastrointestinal microbiome and human proteome has been demonstrated, both for  
490 MHC I and MHC II (51). This may enable microbes to escape immune surveillance by  
491 presenting peptides similar to the host and may also lead to microbial exposure cross-  
492 activating autoreactive T cells. Although the association between bacterial infections  
493 and autoimmune disorders is still not fully understood (52), recent reports indicate  
494 molecular mimicry may be responsible for activation of autoimmune diseases (53-57).  
495 Consistent with this, *Brucella* infections have been implicated in several autoimmune  
496 diseases (58-61). The genome of *Brucella melitensis* is predicted to encode for 3197  
497 ORFs distributed over two circular chromosomes (62). However, even with this level of  
498 complexity, microbe/human commonality is extremely high with 99.7% of human  
499 proteins containing bacterial pentapeptides (51, 63). Furthermore, while this study  
500 addresses continuous pentamers which are recognized by CD8+ T cells, such peptides  
501 are overlaid by the discontinuous pentamers presented by MHC II and recognized by  
502 CD4 T cells, with a similar degree of potential cross reactivity (51). Although chicken  
503 ovalbumin is not a host protein of mouse or human, we have demonstrated here that  
504 there is enough commonality for cross reactivity of several putative *Brucella* peptides

505 with SIINFEKL. It is possible that the cross reactivity of transgenic OT-1 immune cells  
506 to *Brucella* could be used in autoimmune studies in mice.

507

508 In summary, we have generated a unique tool to dissect CD8+ T cell responses to  
509 *Brucella* infection using a widely available TCR transgenic. Further, the OT-1 mice may  
510 also be used to probe native *Brucella* infections. Transgenic mice carrying monoclonal T  
511 cell receptors are widely used in immunological research. The results presented here  
512 raise an important caution for the interpretation of experiments based on reactions to  
513 SIINFEKL, or any other small single peptide, unless the presence of the T cell  
514 recognition motif or potential cross reactive near neighbors within the host, its  
515 microbiome, or an organism under study are addressed. Our results also challenge the  
516 assumption that sequence homology will predict molecular mimicry. Thus, using  
517 databases comparing sequence of “self” and pathogens will almost certainly  
518 underestimate the true contribution of molecular mimicry to pathogen-triggered  
519 autoimmunity.

520

## 521 ACKNOWLEDGMENTS

522 This work was supported by NIH grants 4R01-AI073558 and F31-AI115931. We thank  
523 Dr. J.D. Sauer (UW-Madison) for his gift of B3Z cells and pPL2erm-ActA100-B8R-OVA  
524 and Dr. M. Suresh (UW-Madison) for his gift of DC2.4 cells. We thank Dr. M. Imboden



525 (ioGenetics) for insight and discussion during the project. The authors have no conflict  
526 of interest to declare. EJH and RDB are equity holders in ioGenetics LLC.

527

528

529

## 530 REFERENCES

- 531 1. Baldwin CL, Goenka R. 2006. Host immune responses to the intracellular  
532 bacteria *Brucella*: does the bacteria instruct the host to facilitate chronic  
533 infection? *Crit Rev Immunol* 26:407-42.
- 534 2. Durward M, Radhakrishnan G, Harms J, Bareiss C, Magnani D, Splitter GA.  
535 2012. Active evasion of CTL mediated killing and low quality responding CD8+ T  
536 cells contribute to persistence of brucellosis. *PLoS One* 7:e34925.
- 537 3. Durward-Dioia M, Harms J, Khan M, Hall C, Smith JA, Splitter GA. 2015. CD8+  
538 T cell exhaustion, suppressed gamma interferon production, and delayed  
539 memory response induced by chronic *Brucella melitensis* infection. *Infect Immun*  
540 83:4759-71.
- 541 4. Skendros P, Boura P. 2013. Immunity to brucellosis. *Rev Sci Tech* 32:137-47.
- 542 5. Baldwin CL, Parent M. 2002. Fundamentals of host immune response against  
543 *Brucella abortus*: what the mouse model has revealed about control of infection.  
544 *Vet Microbiol* 90:367-82.

- 545 6. Yingst SL, Izadjoo M, Hoover DL. 2013. CD8 knockout mice are protected from  
546 challenge by vaccination with WR201, a live attenuated mutant of *Brucella*  
547 *melitensis*. *Clin Dev Immunol* 2013:686919.
- 548 7. Oliveira SC, Splitter GA. 1995. CD8+ type 1 CD44hi CD45 RBlo T lymphocytes  
549 control intracellular *Brucella abortus* infection as demonstrated in major  
550 histocompatibility complex class I- and class II-deficient mice. *Eur J Immunol*  
551 25:2551-7.
- 552 8. Murphy EA, Parent M, Sathiyaseelan J, Jiang X, Baldwin CL. 2001. Immune  
553 control of *Brucella abortus* 2308 infections in BALB/c mice. *FEMS Immunol Med*  
554 *Microbiol* 32:85-8.
- 555 9. Clarke SR, Barnden M, Kurts C, Carbone FR, Miller JF, Heath WR. 2000.  
556 Characterization of the ovalbumin-specific TCR transgenic line OT-I: MHC  
557 elements for positive and negative selection. *Immunol Cell Biol* 78:110-7.
- 558 10. Hogquist KA, Jameson SC, Heath WR, Howard JL, Bevan MJ, Carbone FR.  
559 1994. T cell receptor antagonist peptides induce positive selection. *Cell* 76:17-27.
- 560 11. Jameson SC, Hogquist KA, Bevan MJ. 1994. Specificity and flexibility in thymic  
561 selection. *Nature* 369:750-2.
- 562 12. Kollmann TR, Reikie B, Blimkie D, Way SS, Hajjar AM, Arispe K, Shaulov A,  
563 Wilson CB. 2007. Induction of protective immunity to *Listeria monocytogenes* in  
564 neonates. *J Immunol* 178:3695-701.

- 565 13. Starks H, Bruhn KW, Shen H, Barry RA, Dubensky TW, Brockstedt D, Hinrichs  
566 DJ, Higgins DE, Miller JF, Giedlin M, Bouwer HG. 2004. *Listeria monocytogenes*  
567 as a vaccine vector: virulence attenuation or existing antivector immunity does  
568 not diminish therapeutic efficacy. *J Immunol* 173:420-7.
- 569 14. Dudani R, Chapdelaine Y, Faassen Hv H, Smith DK, Shen H, Krishnan L, Sad S.  
570 2002. Multiple mechanisms compensate to enhance tumor-protective CD8(+) T  
571 cell response in the long-term despite poor CD8(+) T cell priming initially:  
572 comparison between an acute versus a chronic intracellular bacterium  
573 expressing a model antigen. *J Immunol* 168:5737-45.
- 574 15. van Faassen H, Saldanha M, Gilbertson D, Dudani R, Krishnan L, Sad S. 2005.  
575 Reducing the stimulation of CD8+ T cells during infection with intracellular  
576 bacteria promotes differentiation primarily into a central (CD62LhighCD44high)  
577 subset. *J Immunol* 174:5341-50.
- 578 16. Salis HM, Mirsky EA, Voigt CA. 2009. Automated design of synthetic ribosome  
579 binding sites to control protein expression. *Nat Biotechnol* 27:946-50.
- 580 17. Espah Borujeni A, Channarasappa AS, Salis HM. 2014. Translation rate is  
581 controlled by coupled trade-offs between site accessibility, selective RNA  
582 unfolding and sliding at upstream standby sites. *Nucleic Acids Res* 42:2646-59.
- 583 18. Khan M, Harms JS, Marim FM, Armon L, Hall CL, Liu YP, Banai M, Oliveira SC,  
584 Splitter GA, Smith JA. 2016. The Bacterial Second Messenger Cyclic di-GMP  
585 Regulates *Brucella* Pathogenesis and Leads to Altered Host Immune Response.  
586 *Infect Immun* 84:3458-3470.

- 587 19. Denton AE, Wesselingh R, Gras S, Guillonneau C, Olson MR, Mintern JD, Zeng  
588 W, Jackson DC, Rossjohn J, Hodgkin PD, Doherty PC, Turner SJ. 2011. Affinity  
589 thresholds for naive CD8+ CTL activation by peptides and engineered influenza  
590 A viruses. *J Immunol* 187:5733-44.
- 591 20. Rudolph MG, Stanfield RL, Wilson IA. 2006. How TCRs bind MHCs, peptides,  
592 and coreceptors. *Annu Rev Immunol* 24:419-66.
- 593 21. Bremel RD, Homan EJ. 2010. An integrated approach to epitope analysis II: A  
594 system for proteomic-scale prediction of immunological characteristics.  
595 *ImmunomeRes* 6:8.
- 596 22. Homan EJ, Bremel RD. 2011. Patterns of Predicted T-Cell Epitopes Associated  
597 with Antigenic Drift in Influenza H3N2 Hemagglutinin. *PLoSOne* 6:e26711.
- 598 23. Bremel RD, Homan EJ. 2013. Recognition of higher order patterns in proteins:  
599 immunologic kernels. *PLoS One* 8:e70115.
- 600 24. Rotzschke O, Falk K, Stevanovic S, Jung G, Walden P, Rammensee HG. 1991.  
601 Exact prediction of a natural T cell epitope. *Eur J Immunol* 21:2891-4.
- 602 25. Gambotto A, Dworacki G, Cicinnati V, Kenniston T, Steitz J, Tuting T, Robbins  
603 PD, DeLeo AB. 2000. Immunogenicity of enhanced green fluorescent protein  
604 (EGFP) in BALB/c mice: identification of an H2-Kd-restricted CTL epitope. *Gene*  
605 *Ther* 7:2036-40.

- 606 26. Rausch MP, Sertil AR. 2015. A stressful microenvironment: opposing effects of  
607 the endoplasmic reticulum stress response in the suppression and enhancement  
608 of adaptive tumor immunity. *Int Rev Immunol* 34:104-22.
- 609 27. Adami C, Brunda MJ, Palleroni AV. 1993. In vivo immortalization of murine  
610 peritoneal macrophages: a new rapid and efficient method for obtaining  
611 macrophage cell lines. *J Leukoc Biol* 53:475-8.
- 612 28. Zhou F. 2009. Molecular mechanisms of IFN-gamma to up-regulate MHC class I  
613 antigen processing and presentation. *Int Rev Immunol* 28:239-60.
- 614 29. Ghosh M, Shapiro LH. 2012. In vitro Ag Cross-presentation and in vivo Ag Cross-  
615 presentation by Dendritic Cells in the Mouse. *Bio Protoc* 2:e305.
- 616 30. Karttunen J, Sanderson S, Shastri N. 1992. Detection of rare antigen-presenting  
617 cells by the lacZ T-cell activation assay suggests an expression cloning strategy  
618 for T-cell antigens. *Proc Natl Acad Sci U S A* 89:6020-4.
- 619 31. Bevan MJ, Hogquist KA, Jameson SC. 1994. Selecting the T cell receptor  
620 repertoire. *Science* 264:796-7.
- 621 32. Jones-Carson J, McCollister BD, Clambey ET, Vazquez-Torres A. 2007.  
622 Systemic CD8 T-cell memory response to a Salmonella pathogenicity island 2  
623 effector is restricted to Salmonella enterica encountered in the gastrointestinal  
624 mucosa. *Infect Immun* 75:2708-16.
- 625 33. Hulseberg PD, Zozulya A, Chu HH, Triccas JA, Fabry Z, Sandor M. 2010. The  
626 same well-characterized T cell epitope SIINFEKL expressed in the context of a

- 627 cytoplasmic or secreted protein in BCG induces different CD8+ T cell responses.  
628 Immunol Lett 130:36-42.
- 629 34. Jerne NK. 2004. The somatic generation of immune recognition. 1971. Eur J  
630 Immunol 34:1234-42.
- 631 35. Rajashekara G, Glover DA, Banai M, O'Callaghan D, Splitter GA. 2006.  
632 Attenuated bioluminescent *Brucella melitensis* mutants GR019 (*virB4*), GR024  
633 (*galE*), and GR026 (BMEI1090-BMEI1091) confer protection in mice. Infect  
634 Immun 74:2925-36.
- 635 36. Rajashekara G, Krepps M, Eskra L, Mathison A, Montgomery A, Ishii Y, Splitter  
636 G. 2005. Unraveling *Brucella* genomics and pathogenesis in  
637 immunocompromised IRF-1<sup>-/-</sup> mice. Am J Reprod Immunol 54:358-68.
- 638 37. Ficht TA, Pei J, Kahl-McDonagh M. 2010. In vitro mutagenesis of *Brucella*  
639 species. Methods Mol Biol 634:15-35.
- 640 38. Wu Q, Pei J, Turse C, Ficht TA. 2006. Mariner mutagenesis of *Brucella*  
641 *melitensis* reveals genes with previously uncharacterized roles in virulence and  
642 survival. BMC Microbiol 6:102.
- 643 39. Smith JA, Khan M, Magnani DD, Harms JS, Durward M, Radhakrishnan GK, Liu  
644 YP, Splitter GA. 2013. *Brucella* induces an unfolded protein response via TcpB  
645 that supports intracellular replication in macrophages. PLoS Pathog 9:e1003785.

- 646 40. Qin QM, Pei J, Ancona V, Shaw BD, Ficht TA, de Figueiredo P. 2008. RNAi  
647 screen of endoplasmic reticulum-associated host factors reveals a role for  
648 IRE1alpha in supporting Brucella replication. *PLoS Pathog* 4:e1000110.
- 649 41. Petrova G, Ferrante A, Gorski J. 2012. Cross-reactivity of T cells and its role in  
650 the immune system. *Crit Rev Immunol* 32:349-72.
- 651 42. Ford ML, Evavold BD. 2004. Degenerate recognition of T cell epitopes: impact of  
652 T cell receptor reserve and stability of peptide:MHC complexes. *Mol Immunol*  
653 40:1019-25.
- 654 43. Regner M. 2001. Cross-reactivity in T-cell antigen recognition. *Immunol Cell Biol*  
655 79:91-100.
- 656 44. Sewell AK. 2012. Why must T cells be cross-reactive? *Nat Rev Immunol* 12:669-  
657 77.
- 658 45. Wucherpfennig KW. 2004. T cell receptor crossreactivity as a general property of  
659 T cell recognition. *Mol Immunol* 40:1009-17.
- 660 46. Rock KL, Goldberg AL. 1999. Degradation of cell proteins and the generation of  
661 MHC class I-presented peptides. *Annu Rev Immunol* 17:739-79.
- 662 47. Rudolph MG, Wilson IA. 2002. The specificity of TCR/pMHC interaction. *Curr*  
663 *Opin Immunol* 14:52-65.
- 664 48. Arstila TP, Casrouge A, Baron V, Even J, Kanellopoulos J, Kourilsky P. 1999. A  
665 direct estimate of the human alphabeta T cell receptor diversity. *Science*  
666 286:958-61.

- 667 49. Mason D. 1998. A very high level of crossreactivity is an essential feature of the  
668 T-cell receptor. *Immunol Today* 19:395-404.
- 669 50. Wilson DB, Wilson DH, Schroder K, Pinilla C, Blondelle S, Houghten RA, Garcia  
670 KC. 2004. Specificity and degeneracy of T cells. *Mol Immunol* 40:1047-55.
- 671 51. Bremel RD, Homan J. 2015. Extensive T-cell epitope repertoire sharing among  
672 human proteome, gastrointestinal microbiome, and pathogenic bacteria:  
673 Implications for the definition of self. *Frontiers in Immunology* 6.
- 674 52. Bogdanos DP, Sakkas LI. 2017. From microbiome to infectome in autoimmunity.  
675 *Curr Opin Rheumatol* 29:369-373.
- 676 53. Augustyniak D, Majkowska-Skrobek G, Roszkowiak J, Dorotkiewicz-Jach A.  
677 2017. Defensive and offensive cross-reactive antibodies elicited by pathogens:  
678 the Good, the Bad and the Ugly. *Curr Med Chem*  
679 doi:10.2174/0929867324666170508110222.
- 680 54. Chmiela M, Gonciarz W. 2017. Molecular mimicry in *Helicobacter pylori*  
681 infections. *World J Gastroenterol* 23:3964-3977.
- 682 55. Cossu D, Yokoyama K, Hattori N. 2017. Conflicting Role of *Mycobacterium*  
683 Species in Multiple Sclerosis. *Front Neurol* 8:216.
- 684 56. Geginat J, Paroni M, Pagani M, Galimberti D, De Francesco R, Scarpini E,  
685 Abrignani S. 2017. The Enigmatic Role of Viruses in Multiple Sclerosis: Molecular  
686 Mimicry or Disturbed Immune Surveillance? *Trends Immunol* 38:498-512.



- 687 57. Rashid T, Ebringer A, Wilson C. 2017. The link between *Proteus mirabilis*,  
688 environmental factors and autoantibodies in rheumatoid arthritis. *Clin Exp*  
689 *Rheumatol*.
- 690 58. Ahmadinejad Z, Abdollahi A, Ziaee V, Domiraei Z, Najafizadeh SR, Jafari S,  
691 Ahmadinejad M. 2016. Prevalence of positive autoimmune biomarkers in the  
692 brucellosis patients. *Clin Rheumatol* 35:2573-8.
- 693 59. Bourantas LK, Pappas G, Kapsali E, Gougopoulou D, Papamichail D, Bourantas  
694 KL. 2010. Brucellosis-induced autoimmune hemolytic anemia treated with  
695 rituximab. *Ann Pharmacother* 44:1677-80.
- 696 60. Girschick HJ, Guilherme L, Inman RD, Latsch K, Rihl M, Sherer Y, Shoenfeld Y,  
697 Zeidler H, Arienti S, Doria A. 2008. Bacterial triggers and autoimmune rheumatic  
698 diseases. *Clin Exp Rheumatol* 26:S12-7.
- 699 61. Justin S, Gazzard B. 2003. Autoimmune hepatitis caused by *Brucella*: causal or a  
700 mere association? *Int J Clin Pract* 57:565-6.
- 701 62. DelVecchio VG, Wagner MA, Eschenbrenner M, Horn TA, Kraycer JA, Estock F,  
702 Elzer P, Mujer CV. 2002. *Brucella* proteomes--a review. *Vet Microbiol* 90:593-  
703 603.
- 704 63. Kanduc D. 2012. Peptide cross-reactivity: the original sin of vaccines. *Front*  
705 *Biosci (Schol Ed)* 4:1393-401.
- 706
- 707



## 709 **FIGURE LEGENDS**

710

711 **Figure 1.** Transposon map of inserted elements. OVA-CFP and kanamycin coding  
712 sequence along with synthetic RBS and R6K origin of replication for rescue cloning are  
713 displayed. Also represented are the locations of SIINFEKL peptide in the partial  
714 chicken ovalbumin sequence and HYSLTQSAL peptide in the ECFP sequence. ME  
715 (mosaic ends) and loxP sites for Cre/lox recombination are also displayed.

716

717 **Figure 2.** Western analyses of Transposon transformed *Brucella* lysates. Equivalent  
718 amounts of *Brucella* clones were lysed, denatured in SDS-laemmli sample buffer, PAGE  
719 separated, and blotted. Antibodies to chicken ovalbumin (OVA) or Green Fluorescent  
720 Protein (GFP) were used along with HRP secondary antibody. Chemiluminescence  
721 was detected by X-ray film. (N) parental *Brucella*; (1,3,4,7) Transposon Transformed  
722 *Brucella* clones; (+OVA) chicken ovalbumin; (+GFP) Green Fluorescent Protein; (MW)  
723 molecular weight marker.

724

725 **Figure 3.** *In Vitro* and *In Vivo* Colony Forming Units (CFU) of *Brucella* infected  
726 macrophages and splenocytes. Parental *Brucella* along with transformed *Brucella*  
727 clones #3 and #4 were used to infect C57BL/6 Bone Marrow Derived Macrophages  
728 (BMDM) in culture (100 MOI) for 24 h or infect mice (C57BL/6) at  $2 \times 10^6$  bacteria for 7  
729 days. Data are representative of three experiments.

730

731 **Figure 4.** Fluorescence microscopy analyses of H2K<sup>b</sup>-SIINFEKL. BMDM from  
732 C57BL/6 mice were either pulsed with SIINFEKL peptide (A), infected with 1000 MOI  
733 parental *B. melitensis* (B. mel) (B), or infected with 1000 MOI *B. melitensis* OVA-CFP  
734 (clone #4)(C). Both *B. melitensis* strains expressed tdTomato (Red). Cells were fixed  
735 and stained with H2K<sup>b</sup> -SIINFEKL antibody (green). SIINFEKL pulsed cells indicated  
736 H2K<sup>b</sup> was bound to SIINFEKL as expected. Scale bar represents 10 μm.

737

738 **Figure 5.** Cytotoxicity assays. In left panel (A), C57BL/6 mice were immunized with  
739 parental *B. melitensis* or OVA expressing variants. Effector splenic CD8<sup>+</sup> cells from  
740 these mice were used against SIINFEKL-pulsed splenocyte targets at the indicated  
741 effector to target ratio (E:T). Non-specific cell death in unpulsed targets was subtracted  
742 to yield SIINFEKL specific cytotoxicity. In right panel (B), OT-1 CD8<sup>+</sup> effectors were  
743 used against parental *B. melitensis* or OVA expressing variant infected target DC2.4  
744 dendritic cells. SIINFEKL-pulsed targets were used as positive control. Data are  
745 representative of four independent experiments. \*\* p<.05; SIINFEKL-pulsed targets  
746 were significantly different from *B. melitensis* and variants at all E:T. Additionally,  
747 \*\*p<.05; clones #3 and #4 were significantly different from parental *B. melitensis* at 25:1.  
748 \*\*\*p<.001; significantly different from immunized groups, \*\*\*\*p<.0001; significantly  
749 different from infected or peptide-pulsed targets. P-values reflect one way ANOVA  
750 statistical analyses.

751

752 **Figure 6.** IFN- $\gamma$  production by effectors from immunized mice. C57BL/6 mice were  
753 immunized with parental *B. melitensis* or OVA expressing variants (#3, #4), or  
754 SIINFEKL peptide in adjuvant as a positive control. In panel **A**, splenocytes were  
755 pulsed with SIINFEKL peptide and assayed for IFN- $\gamma$  production by ELISA. In panel **B**,  
756 splenocytes from a separate experiment were either not pulsed (Non-Treated) or pulsed  
757 with SIINFEKL, PRGSGSGSL (random, negative control peptide), or infected with *B.*  
758 *mel* (MOI 100). \*\* $p < .05$ ; statistically different from *B. melitensis* and variants.  
759 \*\*\*\* $p < .0001$ ; statistically different from peptide immunized or infected splenocytes. One-  
760 way ANOVA statistical analyses.

761

762 **Figure 7.** ER stress and IFN- $\gamma$  effects on B3Z T cell hybrid activation by infected or  
763 peptide pulsed APCs. DC2.4 dendritic cells were not treated (NT) or treated with UPR  
764 inhibitor TUDCA (500 ng/ml), UPR inducer Tunicamycin (50 ng/ml) or IFN- $\gamma$  (10 ng/ml)  
765 for 24h. APCs were subsequently infected (100 MOI) with *Brucella melitensis* (*B. mel*),  
766 OVA-expressing *B. mel* (*B. mel* OVA-GFP) or Heat-Killed OVA-expressing *B. mel* (*B.*  
767 *mel* OVA-GFP HK) or pulsed (10  $\mu$ g/ml) with peptide for 24h. Control DC2.4 cells were  
768 not infected or pulsed with peptide (SIINFEKL or scrambled negative control). B3Z T  
769 cell hybrids were added and levels of TCR activation were measured through ONPG  
770 assay. Median and standard deviation of three experiments are shown. \*\* $p < .05$ ,  
771 \*\*\*\* $p < .0001$ ; statistically different from control and scrambled peptide using one-way  
772 ANOVA statistical analyses.

773

774 **Figure 8.** B3Z lacZ expression of T cell activation. DC2.4 dendritic cells were pulsed  
775 with 10  $\mu\text{g/ml}$  of the indicated peptides and mixed with B3Z T cell hybrids.  
776 PRGSGSGSL is the scrambled peptide control. After 24 h, T cell activation was  
777 monitored by  $\beta$ -galactosidase expression. Blue cells indicate peptide-MHC I binding of  
778 the TCR and T cell activation.

779

780 **Figure 9.** T cell activation by peptide-MHC I at different peptide dilutions. DC2.4  
781 dendritic cells were pulsed with indicated amounts of peptide and mixed with effector  
782 B3Z T cell hybrids. Levels of TCR activation were measured through ONPG assay.  
783 Median and Standard Deviation of six assays are shown. Left graph (A) shows data  
784 expressed as stacked columns of various dilutions of each peptide. Right graph (B)  
785 shows the same data expressed as a line graph. Dashed line is SIINFEKL reference  
786 control. One-way ANOVA statistical analyses of median values indicated SIINFEKL  
787 treated samples were significantly different (\*\* $p < .05$ ) from all other treatments at only  
788 0.1  $\mu\text{g}$  peptide concentration.

789

790 **Figure 10.** Immune response to peptides. C57/BL6 mice were immunized with  $10^6$   
791 *Brucella melitensis* (B. mel), *Brucella melitensis* expressing OVA-CFP antigen (B. mel  
792 OVA-CFP) or diluent (Mock). After 3 weeks, splenocytes were harvested and  
793 stimulated with peptide (50  $\mu\text{g}$ ) for 24 hrs and supernatant was assayed for IFN- $\gamma$  by  
794 ELISA. Absorbance readings represent the median and standard deviation of four mice

795 from each immunization group. \*\*\*\* $p < .0001$  significantly different from mock immunized  
796 group in two-way ANOVA statistical analyses.

797

798

799 **Figure 11.** OT-1 CD8+ cell activation by native *Brucella* sequences. Splenocytes from  
800 OT-1 mice were pulsed with 50  $\mu\text{g}$  of peptide for 24 hrs and supernatant was assayed  
801 for IFN- $\gamma$  by ELISA. Absorbance readings represent the median and standard deviation  
802 of four experiments. NT; non-treated. \*\* $p < .05$ ; SIINFEKL is significantly different from  
803 PRGSGSGSL, PQKINIDRT, SSSIQFEKV, and VIIINADKV. \*\*\*\* $p < .0001$ ; PRGSGSGSL  
804 is significantly different from all other treated samples in one-way ANOVA statistical  
805 analyses.

806

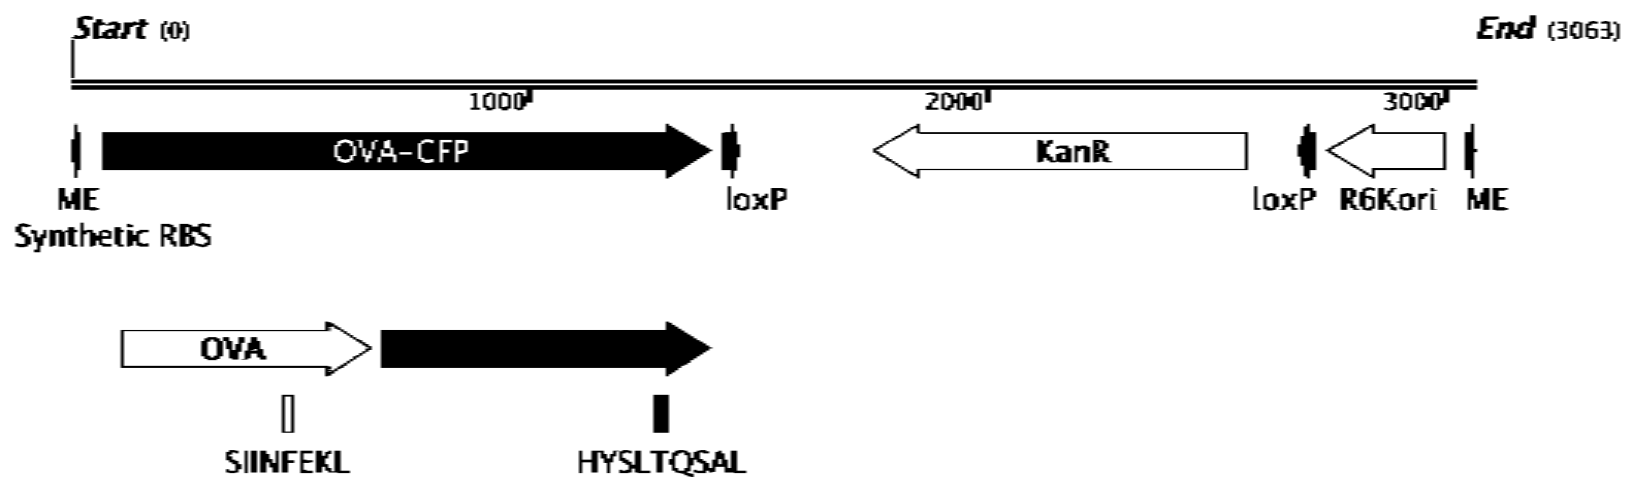



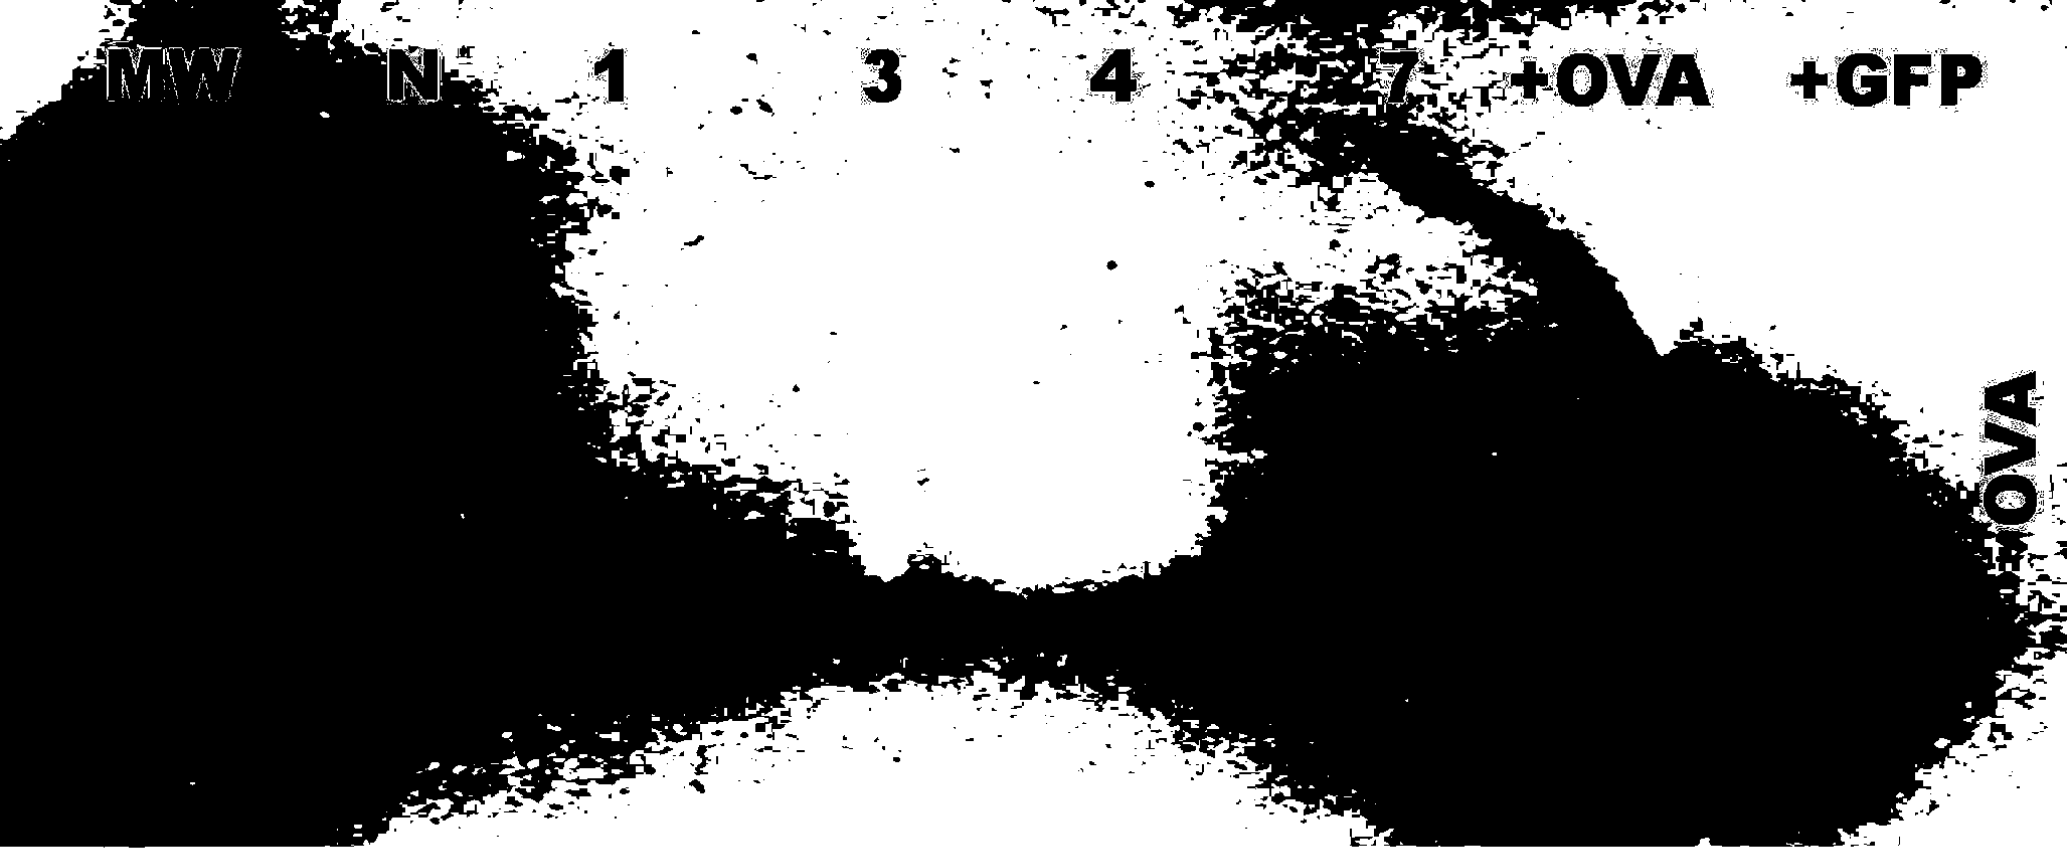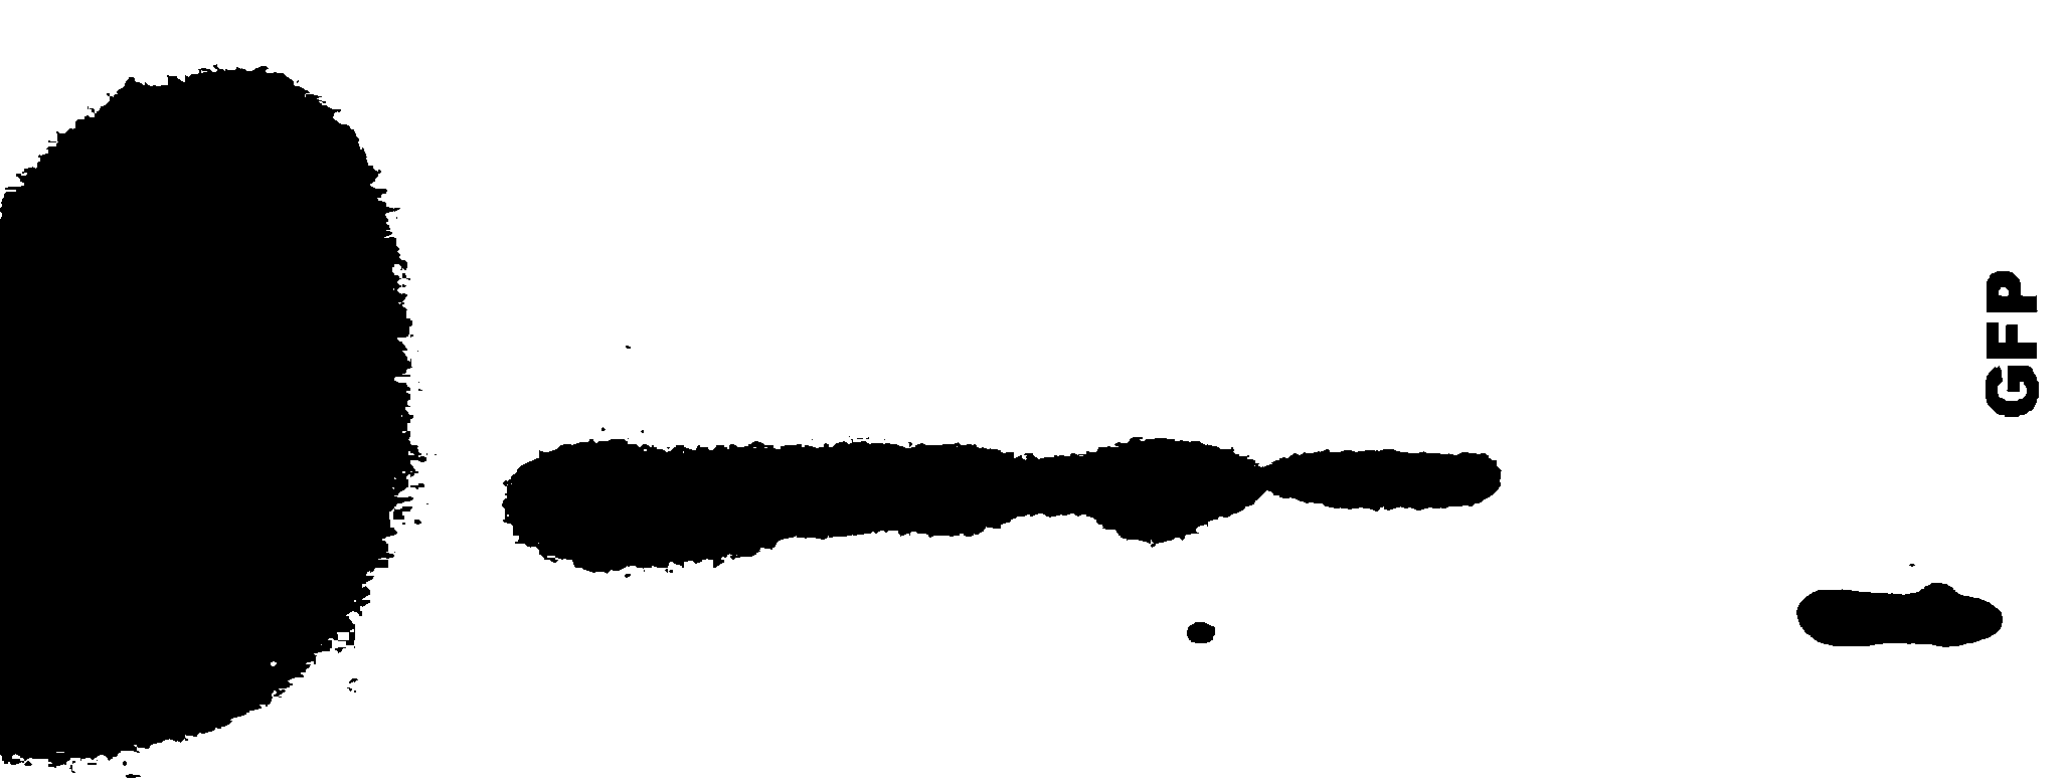

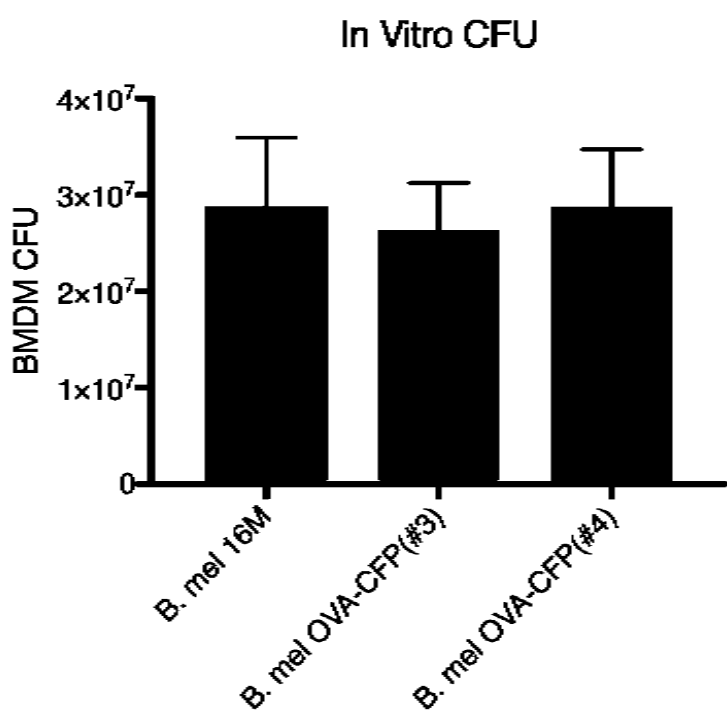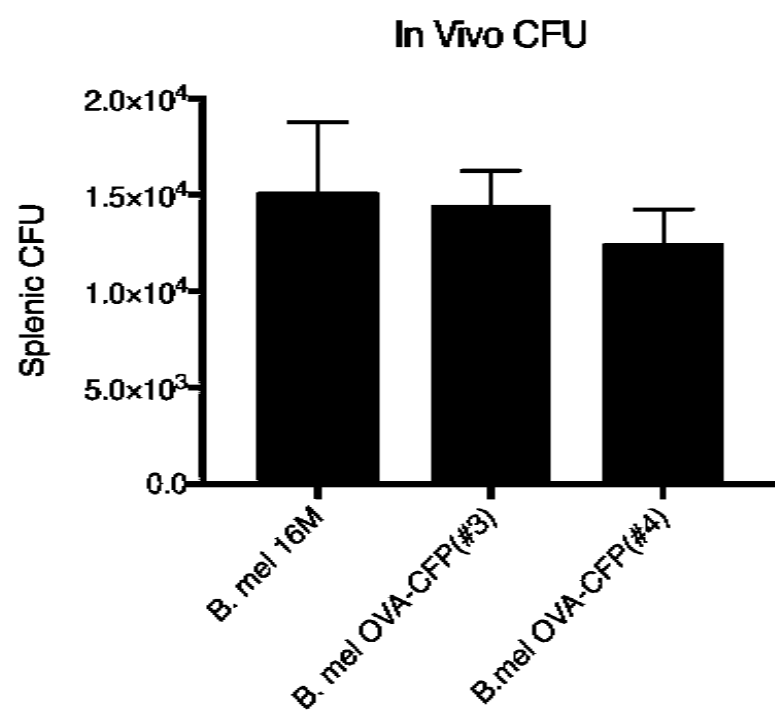

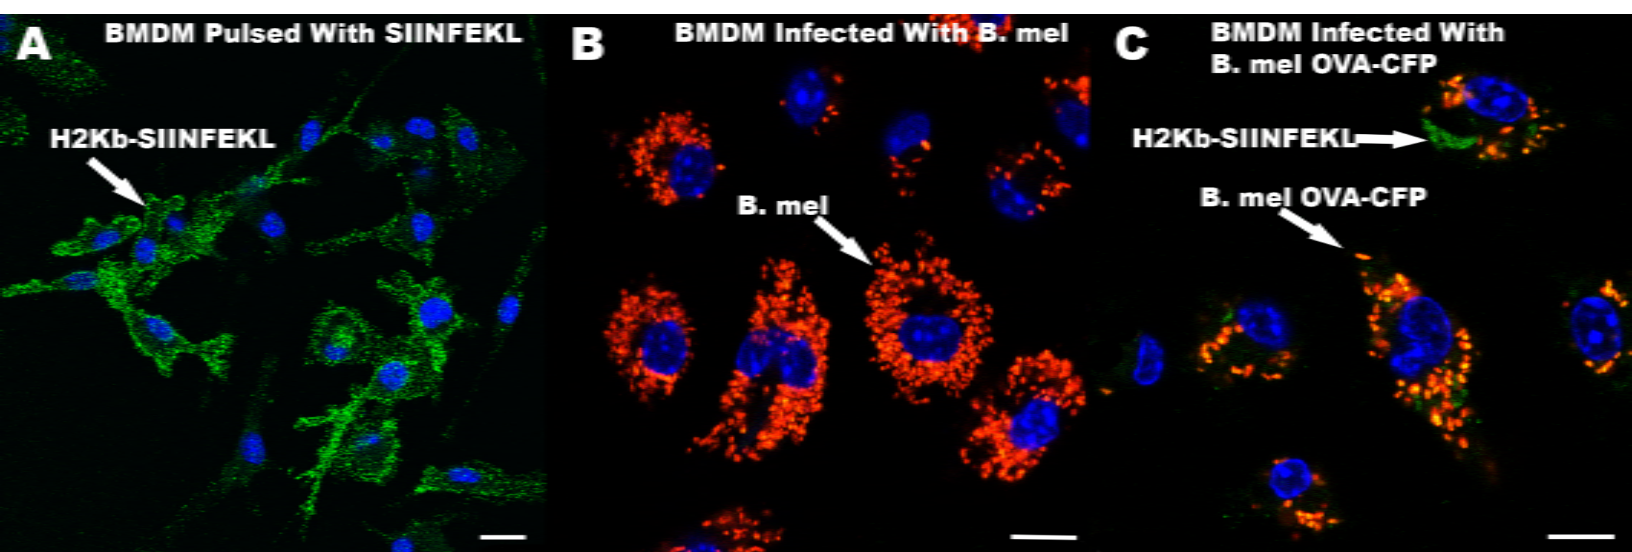

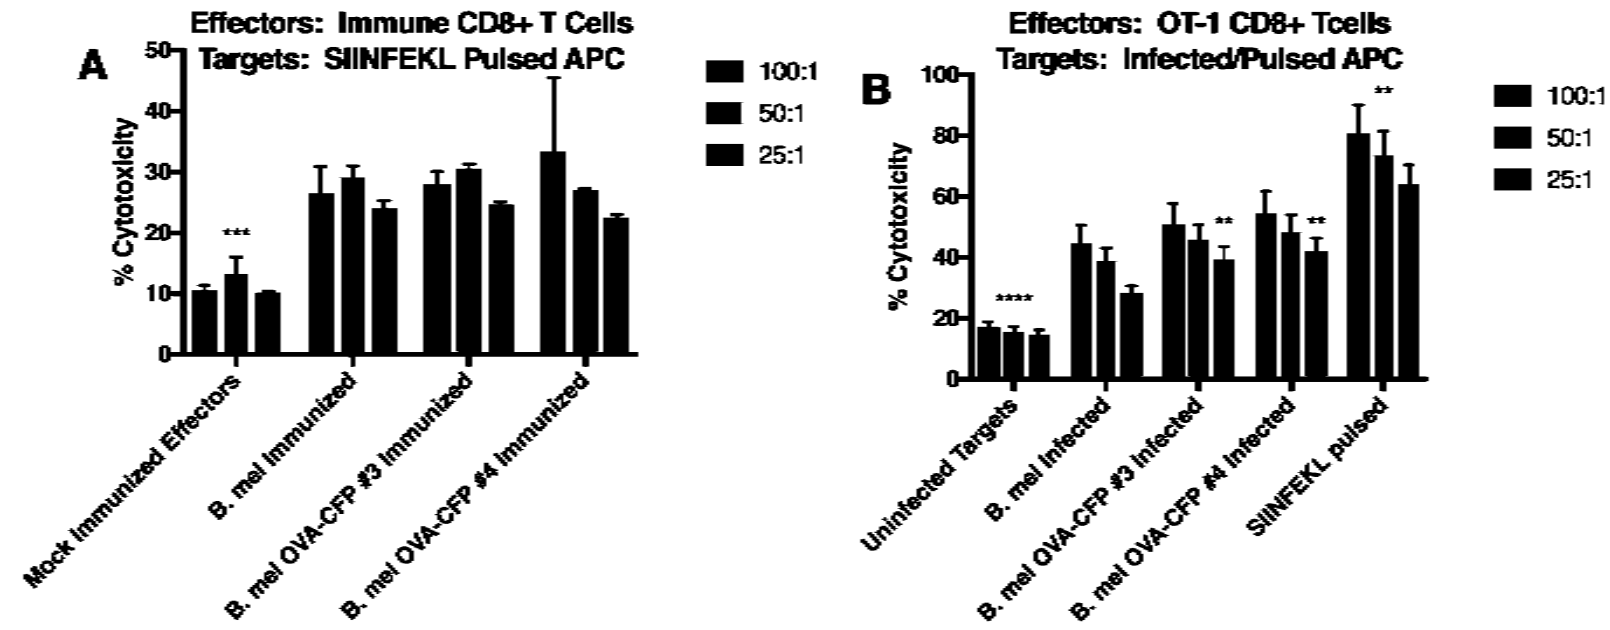

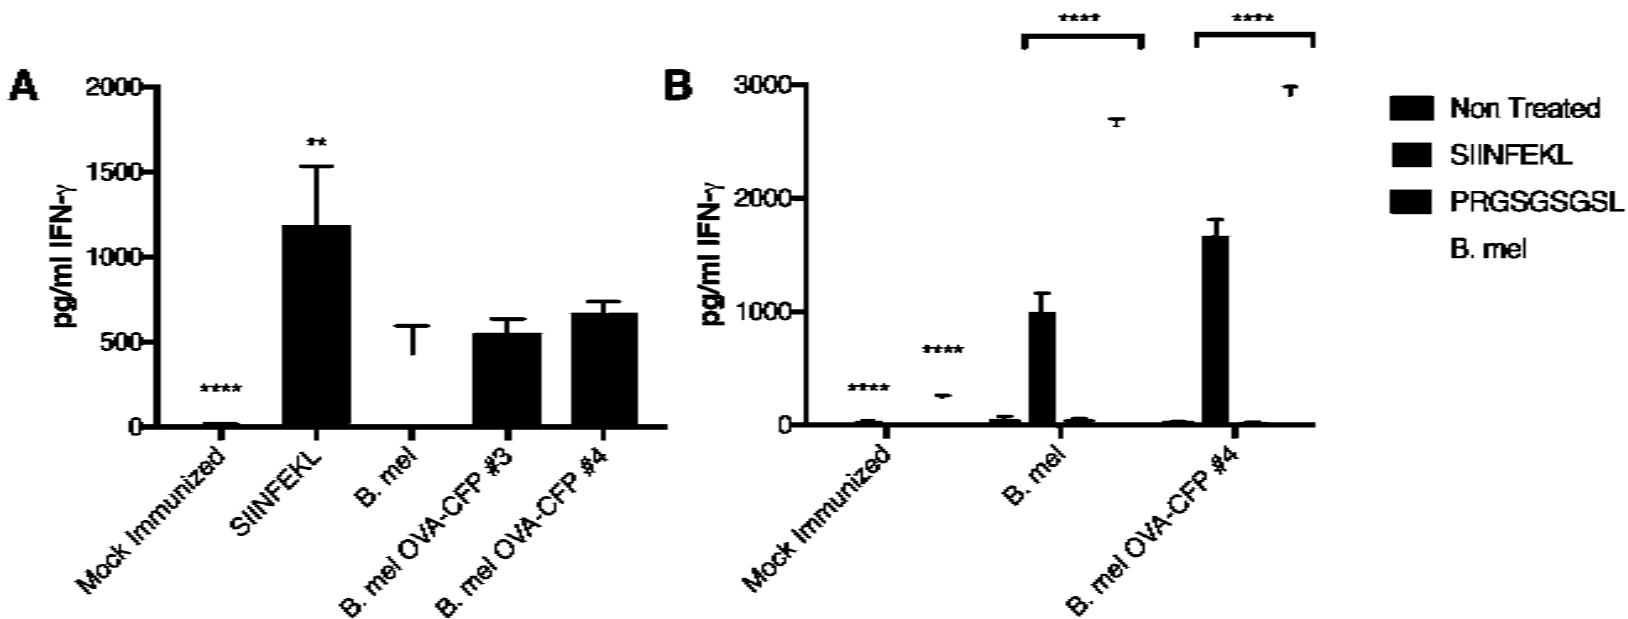

## ER Stress Factor Effect on OVA-TCR T Cell Activation

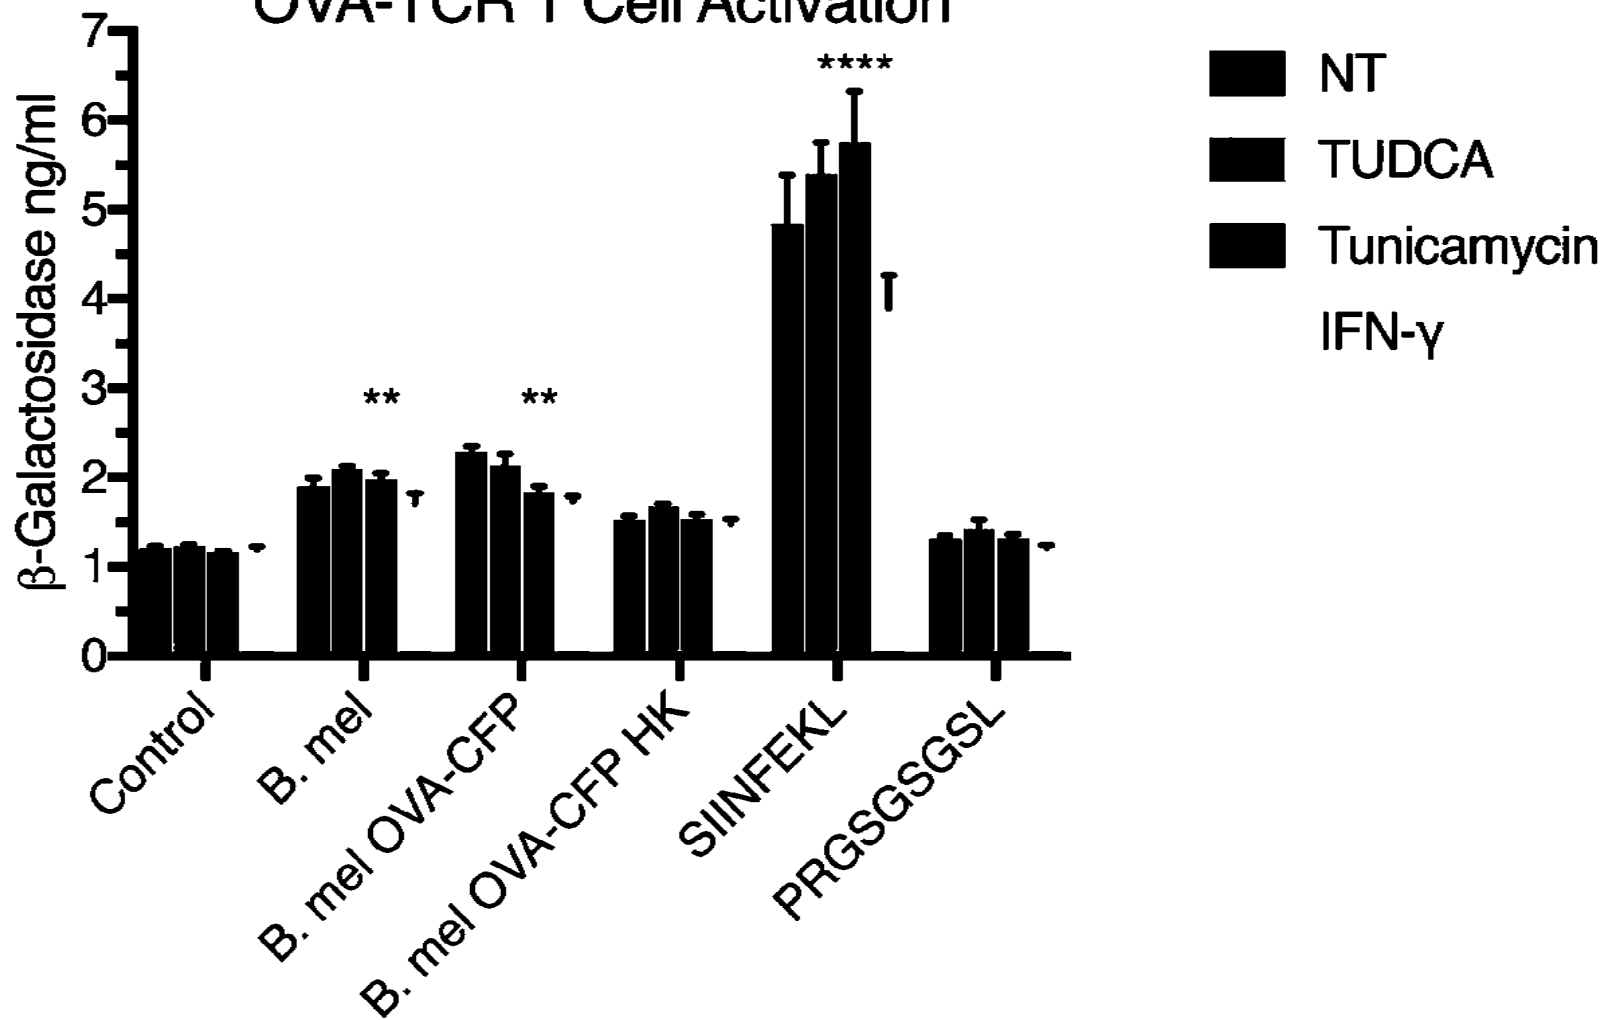

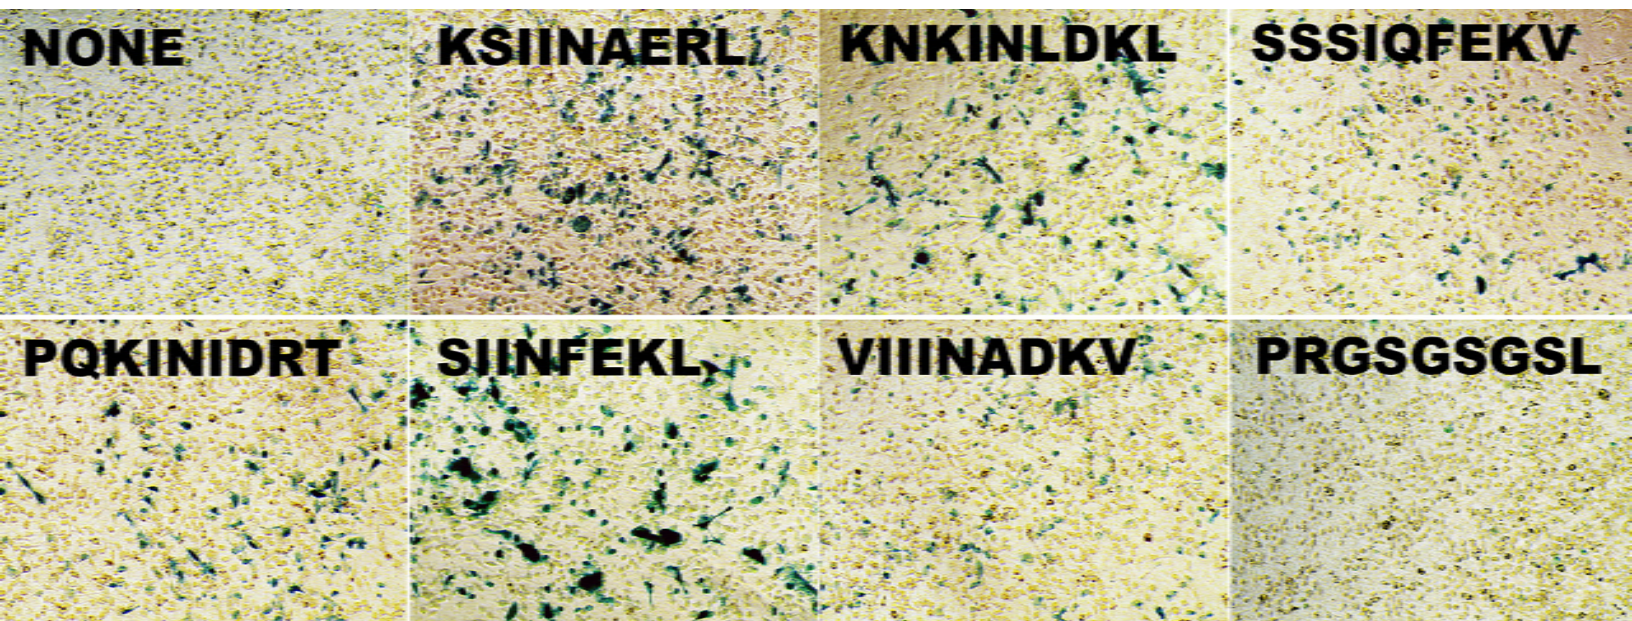

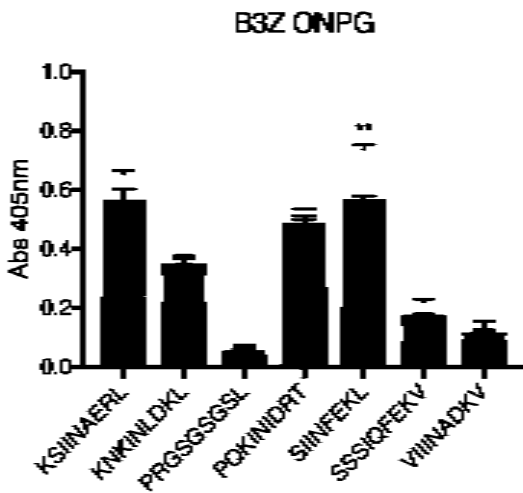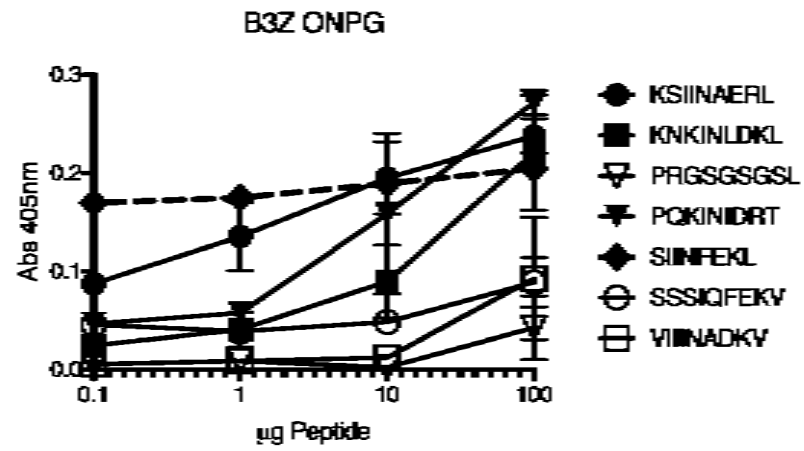



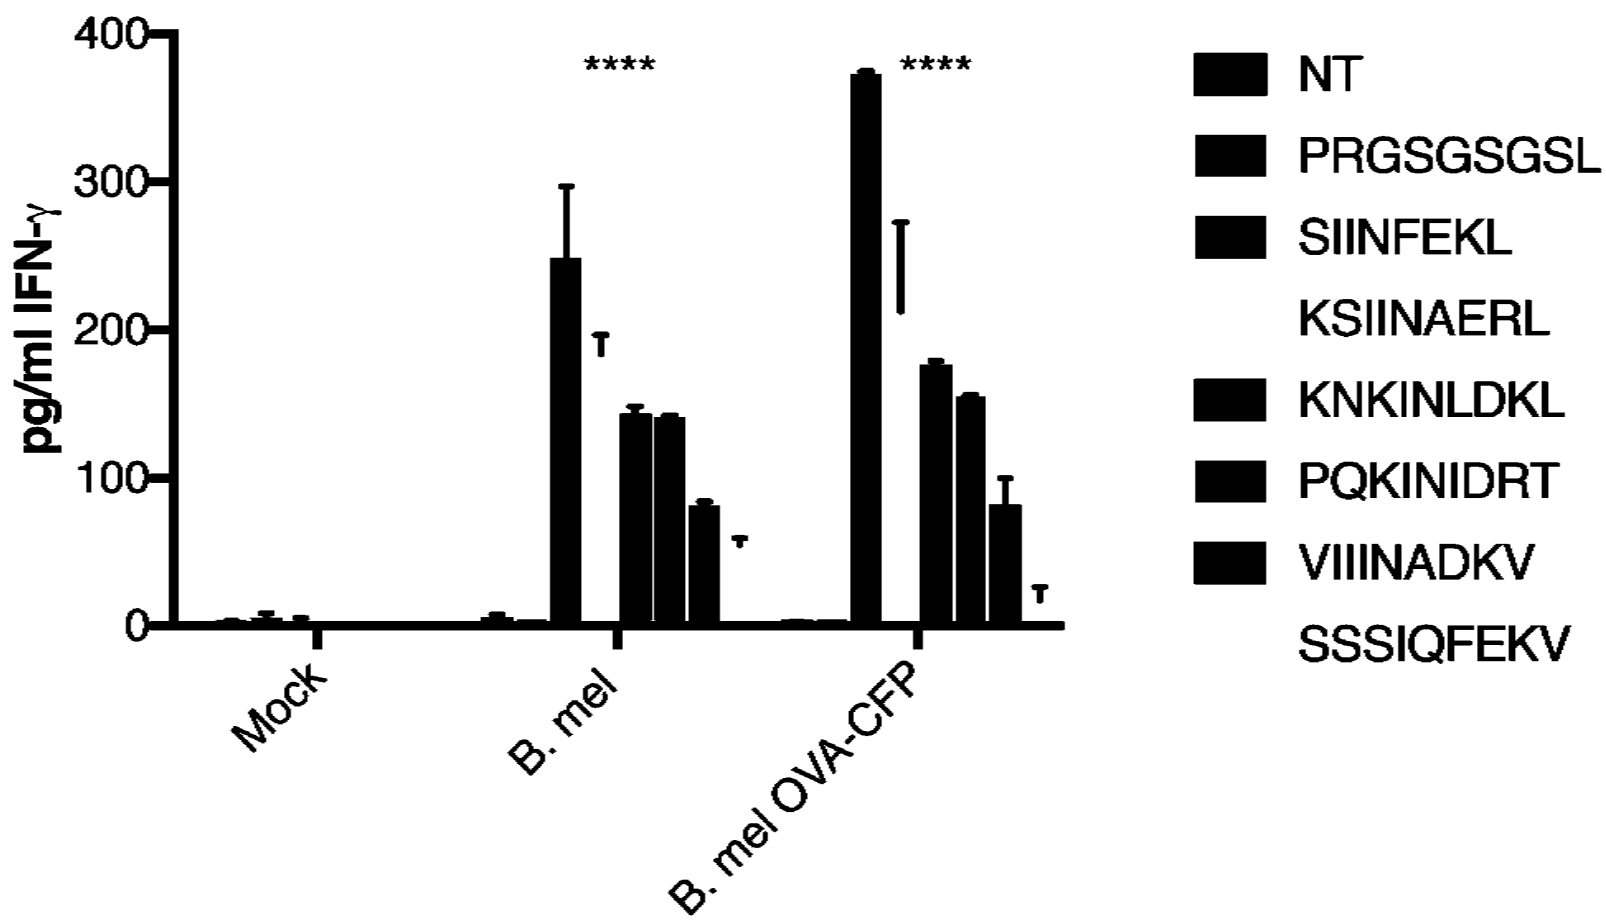

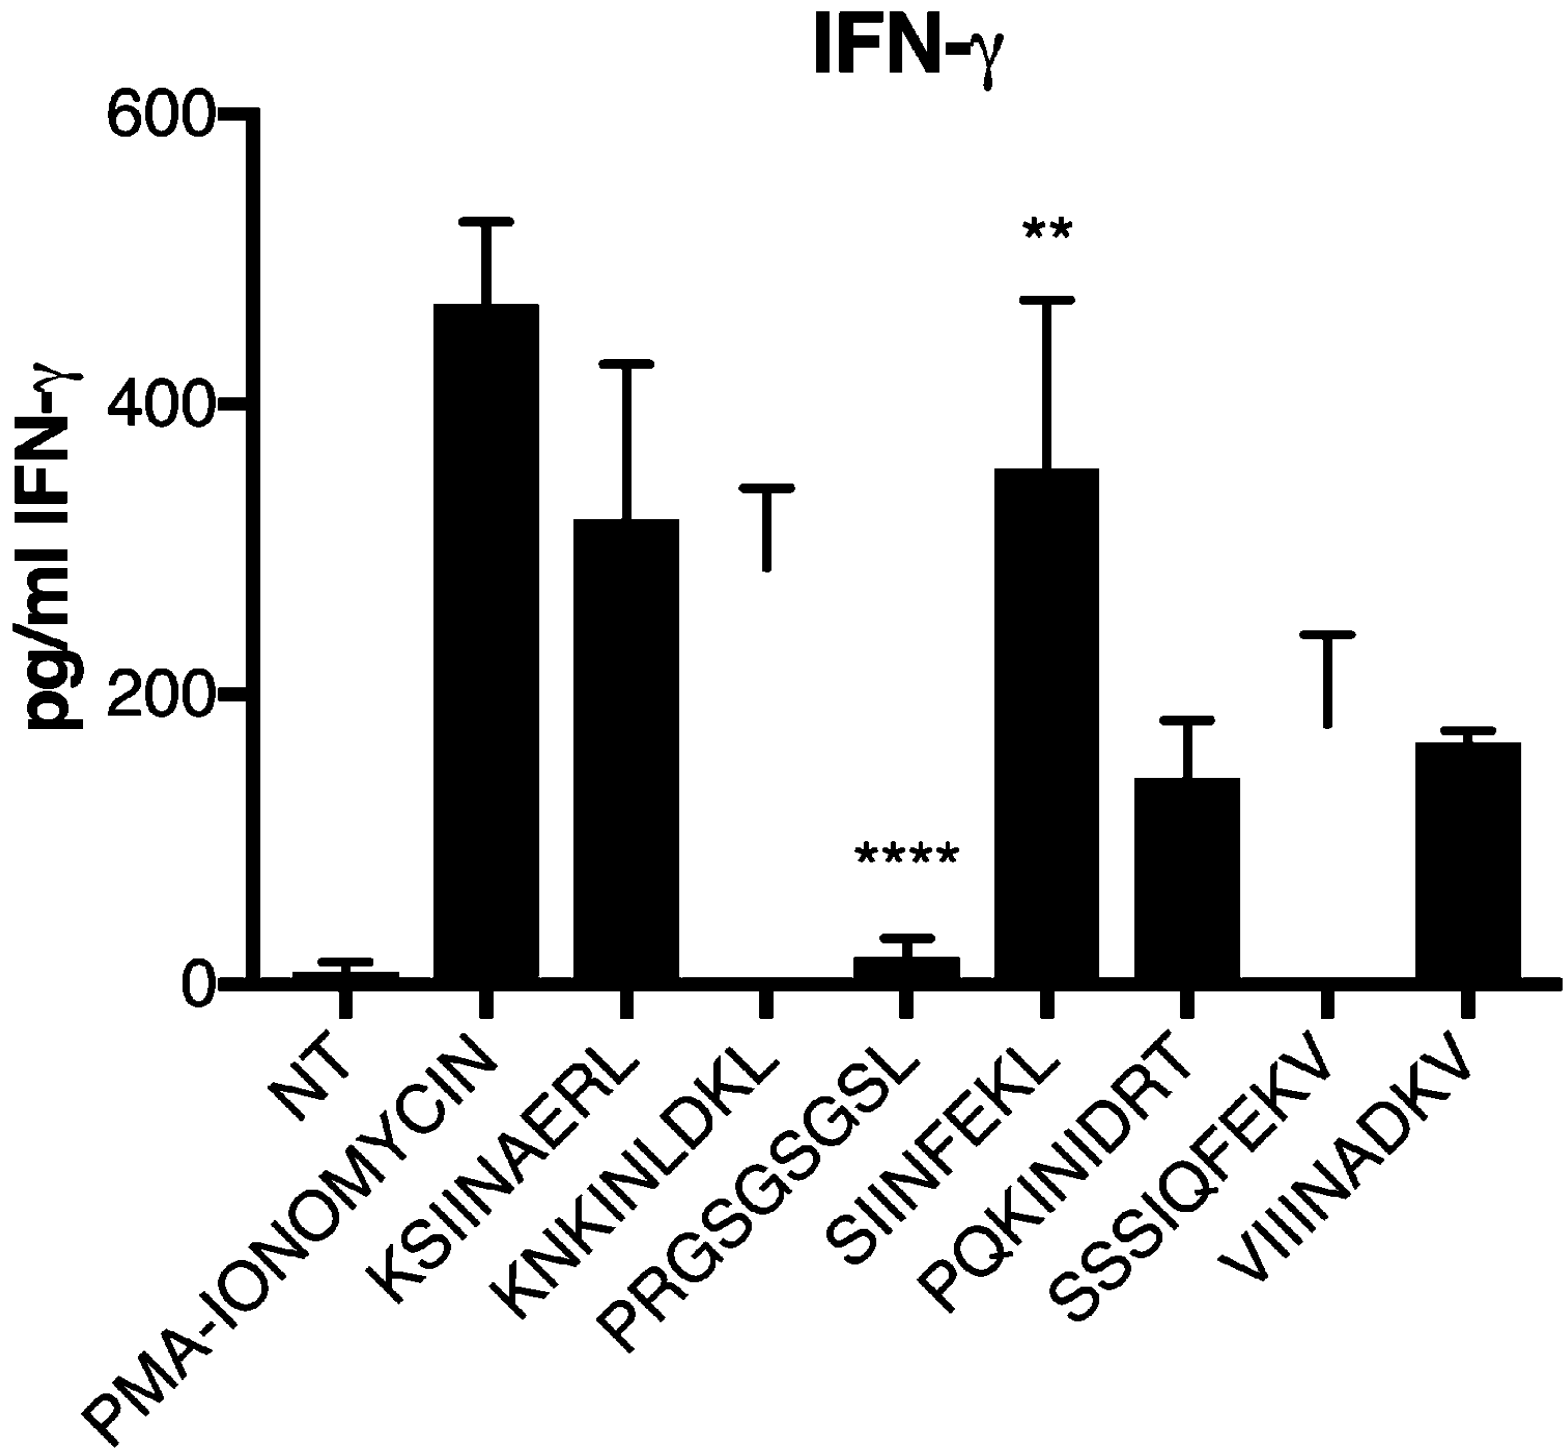

Source: http://biorxiv.org/content/10.1101/301465v1.full.pdf
